# Supplementary material for: Identification of a neural crest stem cell niche by Spatial Genomic Analysis
Source: Springer Nature journal article supplement (doi:10.1038/s41467-017-01561-w), 2017-11-22
Supplement: MOESM1 [file 41467_2017_1561_MOESM1_ESM.pdf]

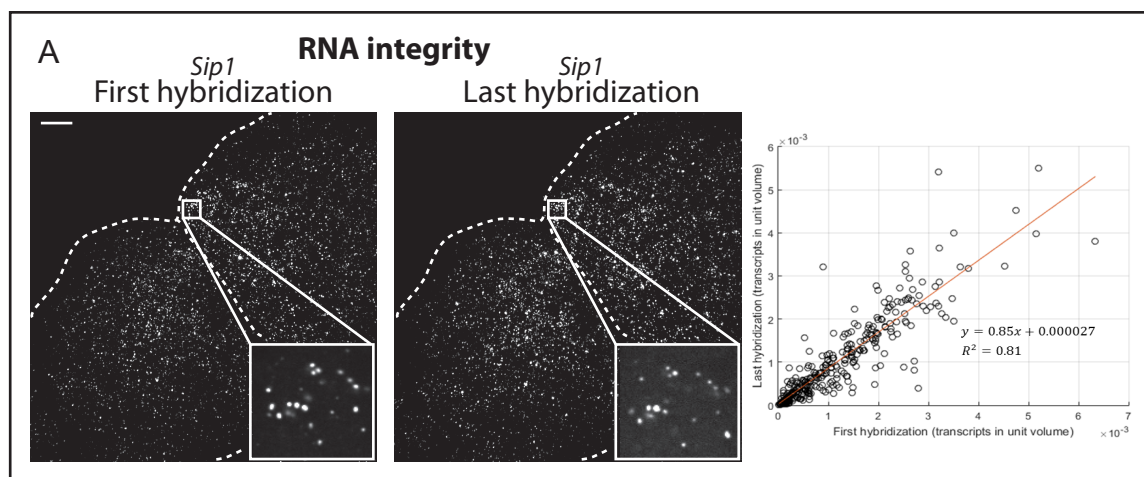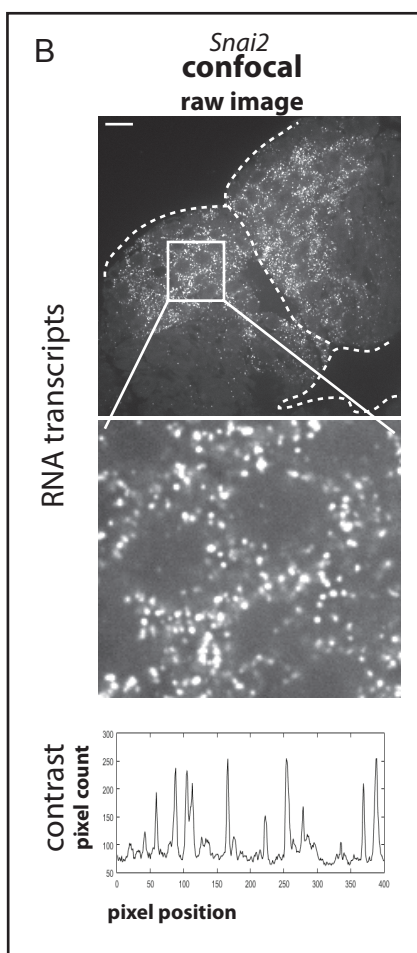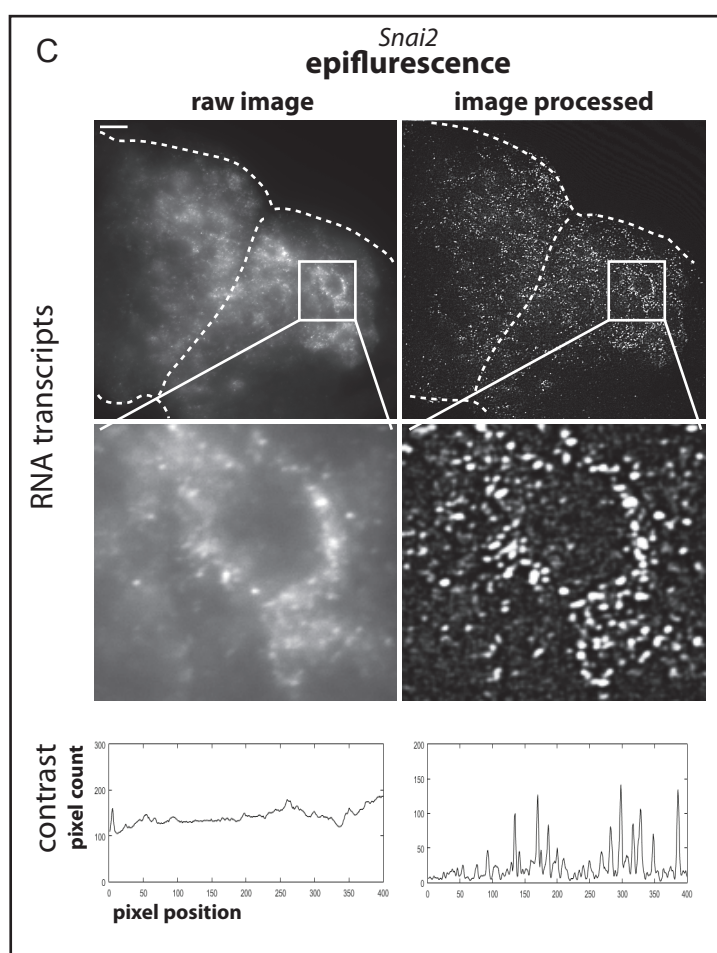

## **Supplementary Figure 1**

**RNA integrity and comparison between imaging methods** A) RNA integrity is preserved after multiple rounds of rehybridization (eleven for this image with *Sip1*) as shown by comparison of the raw transcript images as well as the correlation plot (85% of transcripts are preserved). B-C) Spatial Genomic Analysis (SGA) can be performed using an epifluorescent microscope. Comparison of signal to noise ratio between a raw image taken by a spinning disc confocal microscope (A) and an epifluorescent microscope (B) before and after image processing (Laplacian of Gaussian filter) on the Alexa 488 channel that has the highest autofluorescence. The image processed epifluorescent data are comparable to those acquired by confocal microscopy as shown by the pixel values in the graphs. Scale bar 10 $\mu$ m.

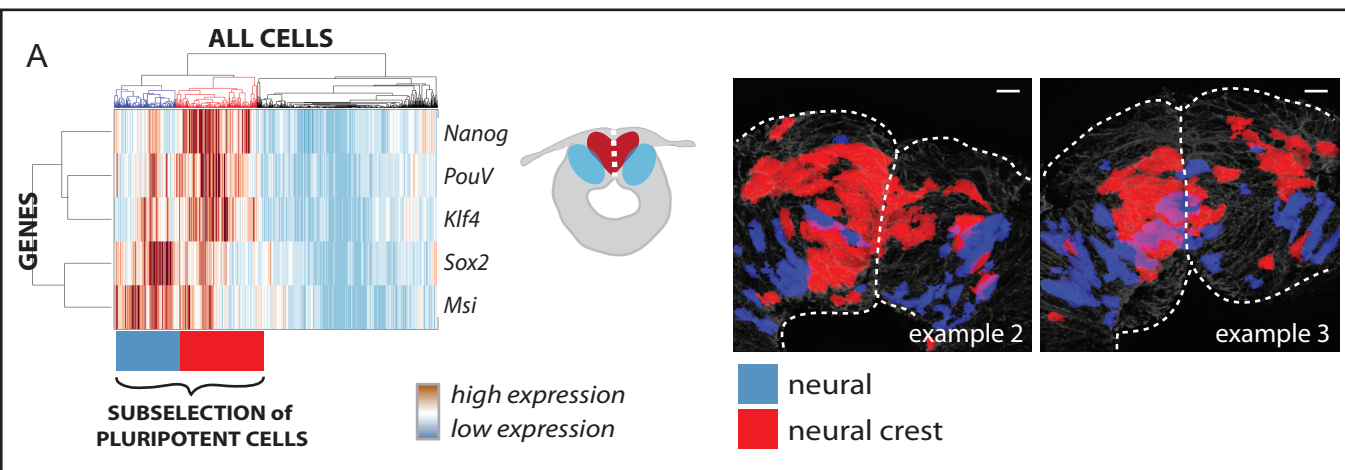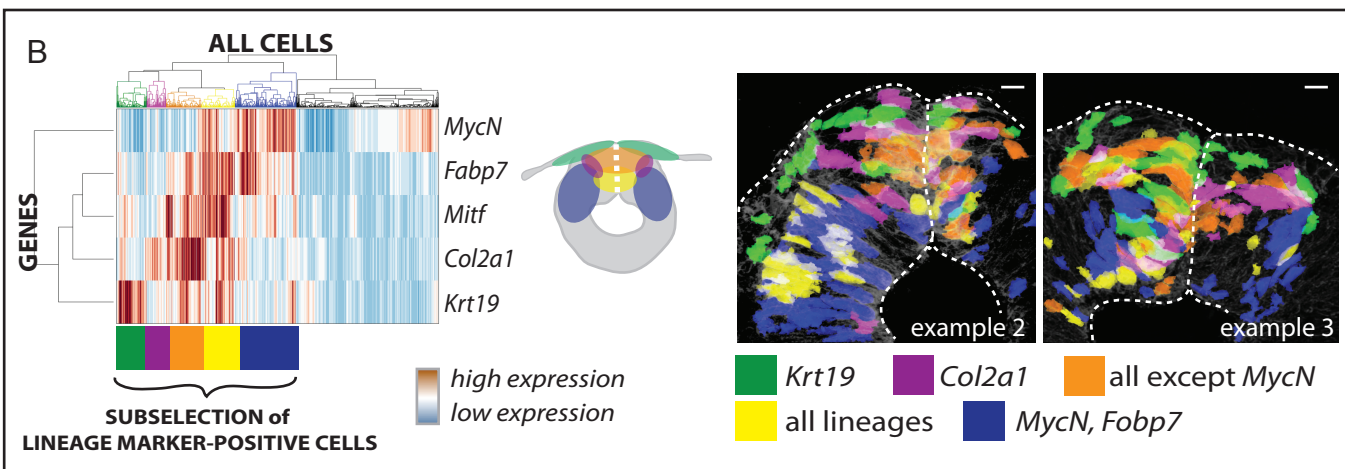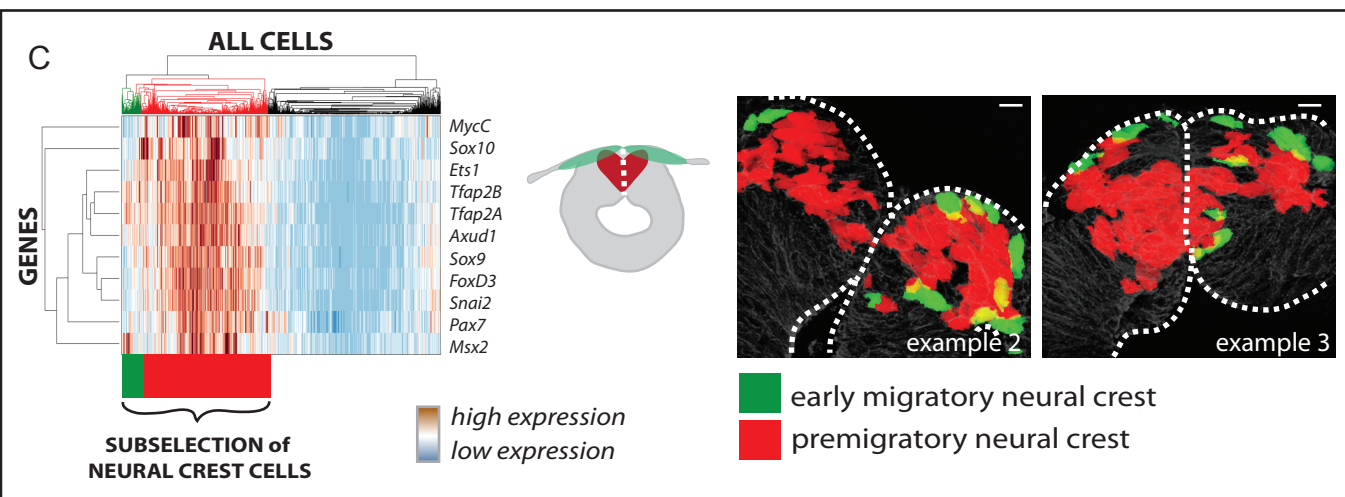

## Supplementary Figure 2

**Reproducibility of the subclusters** For each figure, all 1190 cells were clustered according to a subset of genes. A) The cells expressing pluripotency markers were selected for Figure 4A. Examples 2 and 3 show a similar spatial distribution of neural and neural crest stem cell populations as seen in Figure 4A. B) The cells expressing lineage specific markers were selected for Figure 4B. Examples 2 and 3 show a similar spatial distribution of the cell populations as seen in Figure 4A with the Collagen 2a1 expressing cells found lateral to the “all marker” expression zones, and the migrating cells are defined by expression of *Krt19*. C) The cells expressing neural crest markers were selected for Figure 4C. Examples 2 and 3 show a similar spatial distribution of migratory and premigratory neural crest cell populations as seen in Figure 4C. For the subcluster reproducibility analysis, five samples from three different embryos were compared and three representatives were chosen for the images (n=5). Scale bar 10µm.



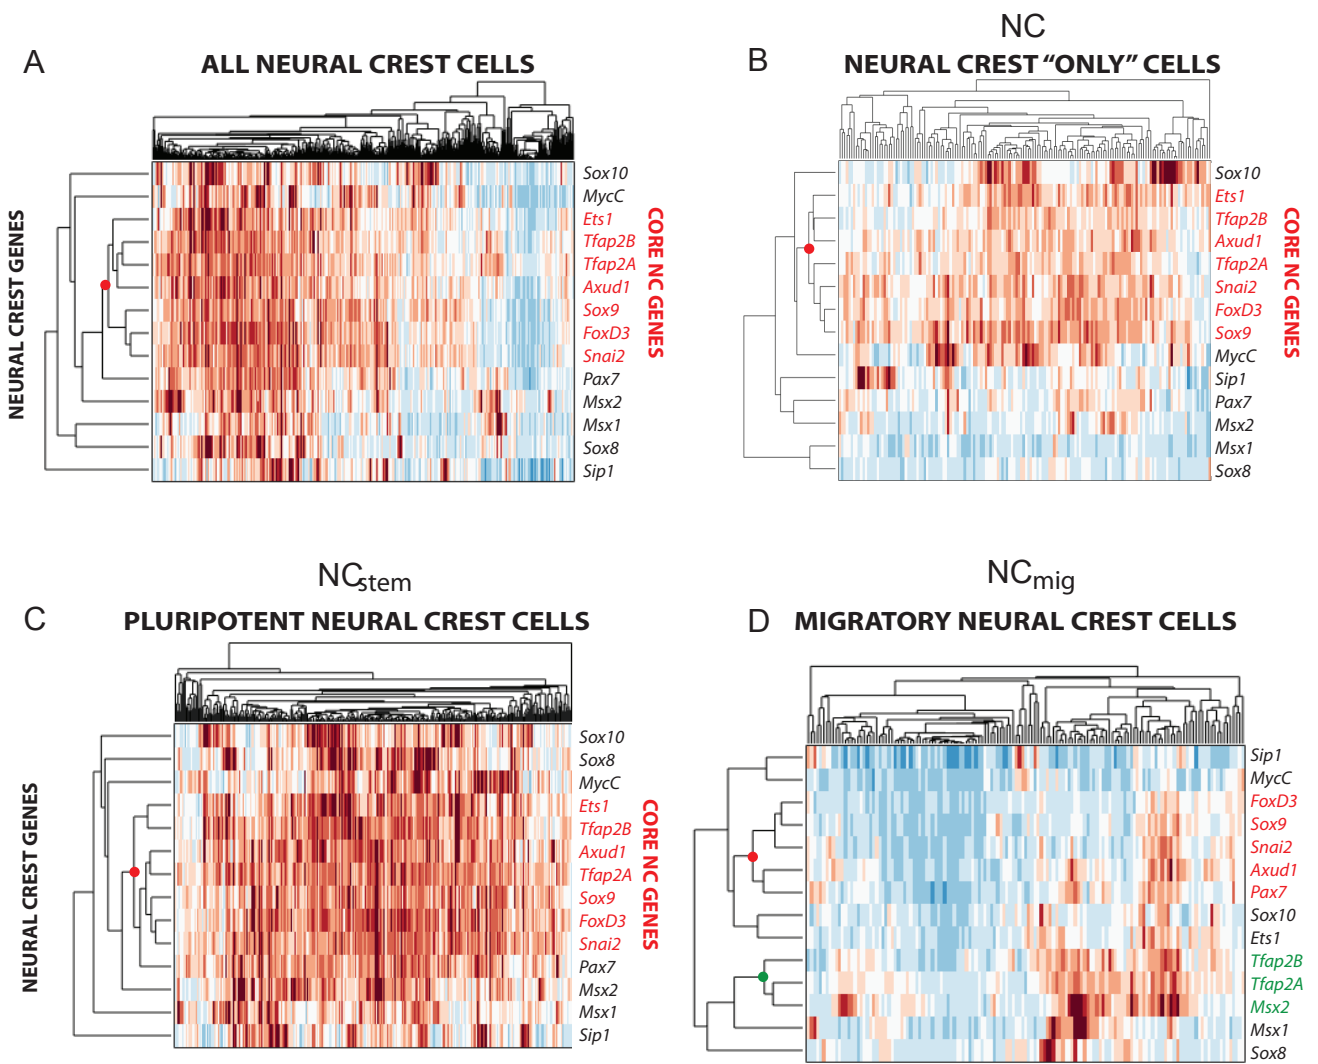

### Supplementary Figure 3

**Identification of core neural crest genes in different subpopulations** Genes with similar expression profiles are more closely clustered in the hierarchical tree. A) The dendrogram in Figure 5 is shown here together with the original heatmap in order to see how the expression of different genes is distributed among the neural crest cell populations. As shown separately in Panels B-D, this clustergram consists of all three different neural crest populations. B-C) The hierarchical clustering of neural crest genes in the NC population and in the NC<sub>stem</sub> population, respectively, are similar to each other and to the dendrogram seen with the pooled data in A. Both populations show the highest similarity among the seven core NC genes (shown in red) and the  $\alpha$  cluster (*Sox9*, *FoxD3* and *Snai2*). D) Migratory neural crest cells have a distinct expression profile and neural crest genes cluster in a slightly different manner in these cells: while the  $\alpha$  cluster is the same as in premigratory cells, but now groups with only five of the core genes (shown in red); *TfAP2 $\alpha$* , *TfAP2 $\beta$* , and *Msx2* form a separate cluster (shown in green).

# Hyb 1

|             |                                                              |
|-------------|--------------------------------------------------------------|
| Foxd3 B1 1  | gtctgccgacatatcgTATAGCATTCTTTCTTGAGGAGGGCAGCAAACGGGAAGAG     |
| Foxd3 B1 2  | accacgtcgatatccacgTATAGCATTCTTTCTTGAGGAGGGCAGCAAACGGGAAGAG   |
| Foxd3 B1 3  | ctcgcggggatcttcacTATAGCATTCTTTCTTGAGGAGGGCAGCAAACGGGAAGAG    |
| Foxd3 B1 4  | gaagccctgcatcatgagTATAGCATTCTTTCTTGAGGAGGGCAGCAAACGGGAAGAG   |
| Foxd3 B1 5  | ggatgtaggggtactgcaTATAGCATTCTTTCTTGAGGAGGGCAGCAAACGGGAAGAG   |
| Foxd3 B1 6  | ttgaaggcttgcggtcTATAGCATTCTTTCTTGAGGAGGGCAGCAAACGGGAAGAG     |
| Foxd3 B1 7  | gggctcgatttcacgatTATAGCATTCTTTCTTGAGGAGGGCAGCAAACGGGAAGAG    |
| Foxd3 B1 8  | ctgaacgaggggcggtgTATAGCATTCTTTCTTGAGGAGGGCAGCAAACGGGAAGAG    |
| Foxd3 B1 9  | aggaaagtctgcgctgTATAGCATTCTTTCTTGAGGAGGGCAGCAAACGGGAAGAG     |
| Foxd3 B1 10 | cgactgcacggtgacgggTATAGCATTCTTTCTTGAGGAGGGCAGCAAACGGGAAGAG   |
| Foxd3 B1 11 | cgggtgctcctggctaacgTATAGCATTCTTTCTTGAGGAGGGCAGCAAACGGGAAGAG  |
| Foxd3 B1 12 | ctgaggtgggcgcatgTATAGCATTCTTTCTTGAGGAGGGCAGCAAACGGGAAGAG     |
| Foxd3 B1 13 | gcgatgatgttggtaggcTATAGCATTCTTTCTTGAGGAGGGCAGCAAACGGGAAGAG   |
| Sox9 B2 1   | aagggtctaggagattcatAAAAAGCTCAGTCCATCCTCGTAAATCCTCATCAATCATC  |
| Sox9 B2 2   | ctgttctctgtcatttcaAAAAAGCTCAGTCCATCCTCGTAAATCCTCATCAATCATC   |
| Sox9 B2 3   | cggagtcatccgacatggtgAAAAAGCTCAGTCCATCCTCGTAAATCCTCATCAATCATC |
| Sox9 B2 4   | gaaggtgttctctgaggtcAAAAAGCTCAGTCCATCCTCGTAAATCCTCATCAATCATC  |
| Sox9 B2 5   | atgcacacggggaattgtcAAAAAGCTCAGTCCATCCTCGTAAATCCTCATCAATCATC  |
| Sox9 B2 6   | tcacgtggggttgttctgAAAAAGCTCAGTCCATCCTCGTAAATCCTCATCAATCATC   |
| Sox9 B2 7   | ttgtgcagatgcgggtactgAAAAAGCTCAGTCCATCCTCGTAAATCCTCATCAATCATC |
| Sox9 B2 8   | ttctgcgtctcattcagcagAAAAAGCTCAGTCCATCCTCGTAAATCCTCATCAATCATC |
| Sox9 B2 9   | aagatggcgttggggagatAAAAAGCTCAGTCCATCCTCGTAAATCCTCATCAATCATC  |
| Sox9 B2 10  | ctgatgctgaggatgactgAAAAAGCTCAGTCCATCCTCGTAAATCCTCATCAATCATC  |
| Sox9 B2 11  | cgtctcggaatcgatgtggAAAAAGCTCAGTCCATCCTCGTAAATCCTCATCAATCATC  |
| Sox9 B2 12  | gagatgacgtcgtcgtgagAAAAAGCTCAGTCCATCCTCGTAAATCCTCATCAATCATC  |
| Sox9 B2 13  | gacgtcgaaggtttcgatgtAAAAAGCTCAGTCCATCCTCGTAAATCCTCATCAATCATC |
| Sox9 B2 14  | gcaggtattgtggaactcgAAAAAGCTCAGTCCATCCTCGTAAATCCTCATCAATCATC  |
| Sox9 B2 15  | tagtgctgcaggttgaaggaAAAAAGCTCAGTCCATCCTCGTAAATCCTCATCAATCATC |
| Sox9 B2 16  | cgggtgaatcgactgcgagAAAAAGCTCAGTCCATCCTCGTAAATCCTCATCAATCATC  |
| Sox9 B2 17  | tagtaggagccggagtctgAAAAAGCTCAGTCCATCCTCGTAAATCCTCATCAATCATC  |
| Sox9 B2 18  | aggtgaaggtggagtagaggAAAAAGCTCAGTCCATCCTCGTAAATCCTCATCAATCATC |
| Sox9 B2 19  | ctcgatgggggtgtacatgAAAAAGCTCAGTCCATCCTCGTAAATCCTCATCAATCATC  |
| Sox9 B2 20  | ttgggtctgcgggatagagAAAAAGCTCAGTCCATCCTCGTAAATCCTCATCAATCATC  |
| Bcl2 B3 1   | ttgtcgtagcctcttctTAAAAAAGTCTAATCCGTCCCTGCCTCTATATCTCCACTC    |
| Bcl2 B3 2   | tgtactcagcactatctTAAAAAAGTCTAATCCGTCCCTGCCTCTATATCTCCACTC    |
| Bcl2 B3 3   | ccgctgcgagagtataTAAAAAAGTCTAATCCGTCCCTGCCTCTATATCTCCACTC     |
| Bcl2 B3 4   | tcactagcagcagccgagTAAAAAAGTCTAATCCGTCCCTGCCTCTATATCTCCACTC   |
| Bcl2 B3 5   | tagcggcgcgagaactcgTAAAAAAGTCTAATCCGTCCCTGCCTCTATATCTCCACTC   |
| Bcl2 B3 6   | gacatctggggaagtccTAAAAAAGTCTAATCCGTCCCTGCCTCTATATCTCCACTC    |
| Bcl2 B3 7   | cgtgaaggcgctcaggtgTAAAAAAGTCTAATCCGTCCCTGCCTCTATATCTCCACTC   |
| Bcl2 B3 8   | tcaccacggccacgaagTAAAAAAGTCTAATCCGTCCCTGCCTCTATATCTCCACTC    |
| Bcl2 B3 9   | ttgacccatcacggaagTAAAAAAGTCTAATCCGTCCCTGCCTCTATATCTCCACTC    |
| Bcl2 B3 10  | aagaaggcgacgatccggTAAAAAAGTCTAATCCGTCCCTGCCTCTATATCTCCACTC   |
| Bcl2 B3 11  | tcgacgcacatcacgccgTAAAAAAGTCTAATCCGTCCCTGCCTCTATATCTCCACTC   |
| Bcl2 B3 12  | gcgacatctcccgttgaTAAAAAAGTCTAATCCGTCCCTGCCTCTATATCTCCACTC    |
| Bcl2 B3 13  | ggtggcaatgtgtccacTAAAAAAGTCTAATCCGTCCCTGCCTCTATATCTCCACTC    |
| Bcl2 B3 14  | cggttcaggtactcgggtcTAAAAAAGTCTAATCCGTCCCTGCCTCTATATCTCCACTC  |
| Bcl2 B3 15  | aaggcctcatactgttgcTAAAAAAGTCTAATCCGTCCCTGCCTCTATATCTCCACTC   |
| Bcl2 B3 16  | ggtcttcagagagatccaTAAAAAAGTCTAATCCGTCCCTGCCTCTATATCTCCACTC   |
| Bcl2 B3 17  | tgaagctcccaccagaaTAAAAAAGTCTAATCCGTCCCTGCCTCTATATCTCCACTC    |
| Bcl2 B3 18  | tgtcaagataagcgccaTAAAAAAGTCTAATCCGTCCCTGCCTCTATATCTCCACTC    |
| Sip1 B4 1   | gcttcgggtaaataatggcATTTACATTTACAGACCTCAACCTACCTCCAACCTCTCAC  |
| Sip1 B4 2   | acgagaagttctcctattcATTTACATTTACAGACCTCAACCTACCTCCAACCTCTCAC  |
| Sip1 B4 3   | gtaggcaaactgttagctacATTTACATTTACAGACCTCAACCTACCTCCAACCTCTCAC |
| Sip1 B4 4   | gcatttgaacttgcgattgcATTTACATTTACAGACCTCAACCTACCTCCAACCTCTCAC |
| Sip1 B4 5   | aaccgatacacttctgtgATTTACATTTACAGACCTCAACCTACCTCCAACCTCTCAC   |
| Sip1 B4 6   | tctcattctgccatttacagATTTACATTTACAGACCTCAACCTACCTCCAACCTCTCAC |
| Sip1 B4 7   | ttaggagaagaacccgtcttATTTACATTTACAGACCTCAACCTACCTCCAACCTCTCAC |

|            |                                                               |
|------------|---------------------------------------------------------------|
| Sip1 B4 8  | tagttgcactaaacccatgtATTTACATTTACAGACCTCAACCTACCTCCAACCTCTCAC  |
| Sip1 B4 9  | aagccaagtaatggtgcttcATTTACATTTACAGACCTCAACCTACCTCCAACCTCTCAC  |
| Sip1 B4 10 | accttcaacttgagatctcATTTACATTTACAGACCTCAACCTACCTCCAACCTCTCAC   |
| Sip1 B4 11 | tggcaccattatgacttactATTTACATTTACAGACCTCAACCTACCTCCAACCTCTCAC  |
| Sip1 B4 12 | caagcttggcttcattgacATTTACATTTACAGACCTCAACCTACCTCCAACCTCTCAC   |
| Sip1 B4 13 | ttatcttcagttaccagggtcATTTACATTTACAGACCTCAACCTACCTCCAACCTCTCAC |
| Sip1 B4 14 | ggagtggatacgttatggttATTTACATTTACAGACCTCAACCTACCTCCAACCTCTCAC  |
| Sip1 B4 15 | taacgctcatgctgatgcaaATTTACATTTACAGACCTCAACCTACCTCCAACCTCTCAC  |
| Sip1 B4 16 | atggtgacctggaacttgagATTTACATTTACAGACCTCAACCTACCTCCAACCTCTCAC  |
| Sip1 B4 17 | tatagagtcacacaggctttaATTTACATTTACAGACCTCAACCTACCTCCAACCTCTCAC |
| Sip1 B4 18 | acactgttatggagttcagcATTTACATTTACAGACCTCAACCTACCTCCAACCTCTCAC  |
| Sip1 B4 19 | tagtgctttatccagggttaATTTACATTTACAGACCTCAACCTACCTCCAACCTCTCAC  |
| Sip1 B4 20 | aaggtttggcactgaatgggATTTACATTTACAGACCTCAACCTACCTCCAACCTCTCAC  |
| Sip1 B4 21 | ctctctggaatgtctgtcATTTACATTTACAGACCTCAACCTACCTCCAACCTCTCAC    |
| Sip1 B4 22 | aggcgtgaatgctcaatcagATTTACATTTACAGACCTCAACCTACCTCCAACCTCTCAC  |
| Sip1 B4 23 | ctatcgtccattgagtgatcATTTACATTTACAGACCTCAACCTACCTCCAACCTCTCAC  |
| Sip1 B4 24 | gtcttctcgtgatctgattATTTACATTTACAGACCTCAACCTACCTCCAACCTCTCAC   |
| Actb B5 1  | cgcagcaatatcatcatccATTTCACTTCATATCACTCACTCCCAATCTCTATCTACCC   |
| Actb B5 2  | ataccggagccattgtcaaATTTCACTTCATATCACTCACTCCCAATCTCTATCTACCC   |
| Actb B5 3  | cccacgatagatgggaacaATTTCACTTCATATCACTCACTCCCAATCTCTATCTACCC   |
| Actb B5 4  | ggctactctcagctcattgATTTCACTTCATATCACTCACTCCCAATCTCTATCTACCC   |
| Actb B5 5  | ctgtgagcagcacagggtgATTTCACTTCATATCACTCACTCCCAATCTCTATCTACCC   |
| Actb B5 6  | ttgctttgggggttcaggATTTCACTTCATATCACTCACTCCCAATCTCTATCTACCC    |
| Actb B5 7  | acagcctggatggctacatATTTCACTTCATATCACTCACTCCCAATCTCTATCTACCC   |
| Actb B5 8  | agagtccatcacataaccaATTTCACTTCATATCACTCACTCCCAATCTCTATCTACCC   |
| Actb B5 9  | cacagtgtgggtaacaccaATTTCACTTCATATCACTCACTCCCAATCTCTATCTACCC   |
| Actb B5 10 | gagggcgtagcctcatagATTTCACTTCATATCACTCACTCCCAATCTCTATCTACCC    |
| Actb B5 11 | agatccagacggaggatggATTTCACTTCATATCACTCACTCCCAATCTCTATCTACCC   |
| Actb B5 12 | gtcacgcacaatttctctcATTTCACTTCATATCACTCACTCCCAATCTCTATCTACCC   |
| Actb B5 13 | ccatctcctgctcgaaatcATTTCACTTCATATCACTCACTCCCAATCTCTATCTACCC   |
| Actb B5 14 | ctccaggaagagctagagATTTCACTTCATATCACTCACTCCCAATCTCTATCTACCC    |
| Actb B5 15 | tgaccatcagggaagtcatATTTCACTTCATATCACTCACTCCCAATCTCTATCTACCC   |
| Actb B5 16 | aacctctcattgccaatggATTTCACTTCATATCACTCACTCCCAATCTCTATCTACCC   |
| Actb B5 17 | cactgtgttgccatacagaATTTCACTTCATATCACTCACTCCCAATCTCTATCTACCC   |
| Actb B5 18 | ctgcactcgtcagcaatgATTTCACTTCATATCACTCACTCCCAATCTCTATCTACCC    |
| Actb B5 19 | gacagggaggccaggatagATTTCACTTCATATCACTCACTCCCAATCTCTATCTACCC   |
| Actb B5 20 | gtccggattcatcgtactcATTTCACTTCATATCACTCACTCCCAATCTCTATCTACCC   |

## Hyb 2

|            |                                                               |
|------------|---------------------------------------------------------------|
| MycC B1 1  | taatcgtagtcttctgctgggTATAGCATTCTTTCTTGAGGAGGGCAGCAAACGGGAAGAG |
| MycC B1 2  | gaagtagaagtagggctgcaTATAGCATTCTTTCTTGAGGAGGGCAGCAAACGGGAAGAG  |
| MycC B1 3  | gctcaaactcttccagatgTATAGCATTCTTTCTTGAGGAGGGCAGCAAACGGGAAGAG   |
| MycC B1 4  | cagatgaagctctggtgacTATAGCATTCTTTCTTGAGGAGGGCAGCAAACGGGAAGAG   |
| MycC B1 5  | ttgacgaaggattcgtcgtcTATAGCATTCTTTCTTGAGGAGGGCAGCAAACGGGAAGAG  |
| MycC B1 6  | atgcagtcctggatgatgatTATAGCATTCTTTCTTGAGGAGGGCAGCAAACGGGAAGAG  |
| MycC B1 7  | ctgagcgggtaggggaagacTATAGCATTCTTTCTTGAGGAGGGCAGCAAACGGGAAGAG  |
| MycC B1 8  | tcttgttcttctccgagtcTATAGCATTCTTTCTTGAGGAGGGCAGCAAACGGGAAGAG   |
| MycC B1 9  | gacatcgatttctcatcttTATAGCATTCTTTCTTGAGGAGGGCAGCAAACGGGAAGAG   |
| MycC B1 10 | cgttcgcttcagctaataTATAGCATTCTTTCTTGAGGAGGGCAGCAAACGGGAAGAG    |
| MycC B1 11 | gactctgtgctggattcagaTATAGCATTCTTTCTTGAGGAGGGCAGCAAACGGGAAGAG  |
| MycC B1 12 | tggatgttgacgtgacaccgTATAGCATTCTTTCTTGAGGAGGGCAGCAAACGGGAAGAG  |
| MycC B1 13 | tgtccaacttttagcctcttgTATAGCATTCTTTCTTGAGGAGGGCAGCAAACGGGAAGAG |
| MycC B1 14 | gactggagcatttctggtgTATAGCATTCTTTCTTGAGGAGGGCAGCAAACGGGAAGAG   |
| MycC B1 15 | tcttgtcgttctcctctgagTATAGCATTCTTTCTTGAGGAGGGCAGCAAACGGGAAGAG  |
| MycC B1 16 | tccaagacgttgtgcttgcTATAGCATTCTTTCTTGAGGAGGGCAGCAAACGGGAAGAG   |
| MycC B1 17 | aactcagcttcagctcattcTATAGCATTCTTTCTTGAGGAGGGCAGCAAACGGGAAGAG  |
| MycC B1 18 | atctggtcacgcagggcaaaTATAGCATTCTTTCTTGAGGAGGGCAGCAAACGGGAAGAG  |
| MycC B1 19 | ttcaggatgacaaccttgggTATAGCATTCTTTCTTGAGGAGGGCAGCAAACGGGAAGAG  |
| MycC B1 20 | cagaacgtactccgtggcttTATAGCATTCTTTCTTGAGGAGGGCAGCAAACGGGAAGAG  |

|            |                                                              |
|------------|--------------------------------------------------------------|
| MycC B1 21 | tgtgctcgtccgattggataTATAGCATTCTTTCTTGAGGAGGGCAGCAAACGGGAAGAG |
| MycC B1 22 | tgctcttctctcgcgattagTATAGCATTCTTTCTTGAGGAGGGCAGCAAACGGGAAGAG |
| MycC B1 23 | tggttttcaactgttctctcTATAGCATTCTTTCTTGAGGAGGGCAGCAAACGGGAAGAG |
| MycC B1 24 | tatgcacgagagttccttagTATAGCATTCTTTCTTGAGGAGGGCAGCAAACGGGAAGAG |
| Msx2 B2 1  | ttcgccttggaggagaagcAAAAAGCTCAGTCCATCCTCGTAAATCCTCATCAATCATC  |
| Msx2 B2 2  | tcctcgtcggaggagaaaacAAAAAGCTCAGTCCATCCTCGTAAATCCTCATCAATCATC |
| Msx2 B2 3  | gacacctgacttgtggtgAAAAAGCTCAGTCCATCCTCGTAAATCCTCATCAATCATC   |
| Msx2 B2 4  | gaaggttttgaagagcccAAAAAGCTCAGTCCATCCTCGTAAATCCTCATCAATCATC   |
| Msx2 B2 5  | gttctccgatttgaccgaagAAAAAGCTCAGTCCATCCTCGTAAATCCTCATCAATCATC |
| Msx2 B2 6  | tctgtgcttcctcagagtAAAAAGCTCAGTCCATCCTCGTAAATCCTCATCAATCATC   |
| Msx2 B2 7  | gggaagtagtgaatgggtgAAAAAGCTCAGTCCATCCTCGTAAATCCTCATCAATCATC  |
| Msx2 B2 8  | tgagggagctggagaattcgAAAAAGCTCAGTCCATCCTCGTAAATCCTCATCAATCATC |
| Msx2 B2 9  | ttgacctgggtctctgtgagAAAAAGCTCAGTCCATCCTCGTAAATCCTCATCAATCATC |
| Msx2 B2 10 | cctccgattttgaaccagaAAAAAGCTCAGTCCATCCTCGTAAATCCTCATCAATCATC  |
| Msx2 B2 11 | attttgacttctctagctcAAAAAGCTCAGTCCATCCTCGTAAATCCTCATCAATCATC  |
| Msx2 B2 12 | cgacggcaacattggctcgAAAAAGCTCAGTCCATCCTCGTAAATCCTCATCAATCATC  |
| Msx2 B2 13 | agttgatggggaaaggaggAAAAAGCTCAGTCCATCCTCGTAAATCCTCATCAATCATC  |
| Msx2 B2 14 | taggatgttccgtacagtgaAAAAAGCTCAGTCCATCCTCGTAAATCCTCATCAATCATC |
| Msx2 B2 15 | ataggaagcacaggtctgtgAAAAAGCTCAGTCCATCCTCGTAAATCCTCATCAATCATC |
| Msx2 B2 16 | gagtagcatagagtccaacgAAAAAGCTCAGTCCATCCTCGTAAATCCTCATCAATCATC |
| Msx2 B2 17 | tggtacatgctatatccgacAAAAAGCTCAGTCCATCCTCGTAAATCCTCATCAATCATC |
| Msi1 B3 1  | aagttggttaaagtggcggcTAAAAAGTCTAATCCGTCCCTGCCTCTATATCTCCACTC  |
| Msi1 B3 2  | ggggatgcagagagaagagaTAAAAAGTCTAATCCGTCCCTGCCTCTATATCTCCACTC  |
| Msi1 B3 3  | tggccatgaacgtgacgaaTAAAAAGTCTAATCCGTCCCTGCCTCTATATCTCCACTC   |
| Msi1 B3 4  | tggattgggcccagaacctgTAAAAAGTCTAATCCGTCCCTGCCTCTATATCTCCACTC  |
| Msi1 B3 5  | gtcttgagtgccagttcatgTAAAAAGTCTAATCCGTCCCTGCCTCTATATCTCCACTC  |
| Msi1 B3 6  | gaacgctaccttcgggtcaaTAAAAAGTCTAATCCGTCCCTGCCTCTATATCTCCACTC  |
| Msi1 B3 7  | atcttctcgttcgggtcacTAAAAAGTCTAATCCGTCCCTGCCTCTATATCTCCACTC   |
| Msi1 B3 8  | cactgacagaccaccacaaTAAAAAGTCTAATCCGTCCCTGCCTCTATATCTCCACTC   |
| Msi1 B3 9  | ttcacatcctccacagtagTAAAAAGTCTAATCCGTCCCTGCCTCTATATCTCCACTC   |
| Msi1 B3 10 | tcccaaactgctcgaatacTAAAAAGTCTAATCCGTCCCTGCCTCTATATCTCCACTC   |
| Msi1 B3 11 | acgccactcaagagacttacTAAAAAGTCTAATCCGTCCCTGCCTCTATATCTCCACTC  |
| Msi1 B3 12 | ccagaagcaacagcttggatTAAAAAGTCTAATCCGTCCCTGCCTCTATATCTCCACTC  |
| Msi1 B3 13 | gcaaaacttctcgtcttgTAAAAAGTCTAATCCGTCCCTGCCTCTATATCTCCACTC    |
| Msi1 B3 14 | gtgacaaatccaaacctgaTAAAAAGTCTAATCCGTCCCTGCCTCTATATCTCCACTC   |
| Msi1 B3 15 | agcttgaagcctggataacTAAAAAGTCTAATCCGTCCCTGCCTCTATATCTCCACTC   |
| Msi1 B3 16 | tgtaacttcgactcgcgtagTAAAAAGTCTAATCCGTCCCTGCCTCTATATCTCCACTC  |
| Msi1 B3 17 | tctacacggaactcagggaTAAAAAGTCTAATCCGTCCCTGCCTCTATATCTCCACTC   |
| Msi1 B3 18 | attgttccatacgcagtgaTAAAAAGTCTAATCCGTCCCTGCCTCTATATCTCCACTC   |
| Msi1 B3 19 | agggagggaagtggcagttaTAAAAAGTCTAATCCGTCCCTGCCTCTATATCTCCACTC  |
| Msi1 B3 20 | cagaaatccaccggtgcgacTAAAAAGTCTAATCCGTCCCTGCCTCTATATCTCCACTC  |
| Msi1 B3 21 | tcataaagctctgcatcgTAAAAAGTCTAATCCGTCCCTGCCTCTATATCTCCACTC    |
| Msi1 B3 22 | agcgctgatgaactgctaaTAAAAAGTCTAATCCGTCCCTGCCTCTATATCTCCACTC   |
| Msi1 B3 23 | ctgttgcaatcaagggaaccTAAAAAGTCTAATCCGTCCCTGCCTCTATATCTCCACTC  |
| Msi1 B3 24 | cagtgataccattggtaaaTAAAAAGTCTAATCCGTCCCTGCCTCTATATCTCCACTC   |
| Klf4 B4 1  | tgaactcctcggtttcacgATTTACATTTACAGACCTCAACCTACCTCCAACCTCTCAC  |
| Klf4 B4 2  | tgcatgaggagtgaggagaATTTACATTTACAGACCTCAACCTACCTCCAACCTCTCAC  |
| Klf4 B4 3  | caggttgaaggagcgcgATTTACATTTACAGACCTCAACCTACCTCCAACCTCTCAC    |
| Klf4 B4 4  | catcagctcggccacgaagATTTACATTTACAGACCTCAACCTACCTCCAACCTCTCAC  |
| Klf4 B4 5  | ttgattttggggcacatccATTTACATTTACAGACCTCAACCTACCTCCAACCTCTCAC  |
| Klf4 B4 6  | tggagaagtcgtgttcggaATTTACATTTACAGACCTCAACCTACCTCCAACCTCTCAC  |
| Klf4 B4 7  | atcagctcttggtactgcaATTTACATTTACAGACCTCAACCTACCTCCAACCTCTCAC  |
| Klf4 B4 8  | ttcttttgcaggccatgaATTTACATTTACAGACCTCAACCTACCTCCAACCTCTCAC   |
| Klf4 B4 9  | cgtagtcacaggtgtgagtATTTACATTTACAGACCTCAACCTACCTCCAACCTCTCAC  |
| Klf4 B4 10 | aggtgtgccttgagatgagATTTACATTTACAGACCTCAACCTACCTCCAACCTCTCAC  |
| Klf4 B4 11 | ttccagtcacagtgataaATTTACATTTACAGACCTCAACCTACCTCCAACCTCTCAC   |
| Klf4 B4 12 | gatcgggcaaacttcatcATTTACATTTACAGACCTCAACCTACCTCCAACCTCTCAC   |
| Klf4 B4 13 | ccgtgtgtttcggtaatgATTTACATTTACAGACCTCAACCTACCTCCAACCTCTCAC   |
| Klf4 B4 14 | ggcactggaaggcggtgATTTACATTTACAGACCTCAACCTACCTCCAACCTCTCAC    |

|              |                                                              |
|--------------|--------------------------------------------------------------|
| Klf4 B4 15   | aaaatgctctgtcacaccgATTTACATTTACAGACCTCAACCTACCTCCAACTCTCAC   |
| Klf4 B4 16   | aaggcgaggtgatccgaccATTTACATTTACAGACCTCAACCTACCTCCAACTCTCAC   |
| Klf4 B4 17   | taaaagtcctcttcatgtATTTACATTTACAGACCTCAACCTACCTCCAACTCTCAC    |
| Tfap2A B5 1  | ctcgtacttgatgttatccgATTTCACTTCATATCACTCACTCCCAATCTCTATCTACCC |
| Tfap2A B5 2  | ctgagactggggtagatggATTTCACTTCATATCACTCACTCCCAATCTCTATCTACCC  |
| Tfap2A B5 3  | tcgttgacgtgggagtagggATTTCACTTCATATCACTCACTCCCAATCTCTATCTACCC |
| Tfap2A B5 4  | cagggaagttgaggcttaggATTTCACTTCATATCACTCACTCCCAATCTCTATCTACCC |
| Tfap2A B5 5  | atggcgtgagggatggagtgATTTCACTTCATATCACTCACTCCCAATCTCTATCTACCC |
| Tfap2A B5 6  | tctggtccgggatgttgatgATTTCACTTCATATCACTCACTCCCAATCTCTATCTACCC |
| Tfap2A B5 7  | acggggcctttctaatgacATTTCACTTCATATCACTCACTCCCAATCTCTATCTACCC  |
| Tfap2A B5 8  | gttgtagacttgagagggATTTCACTTCATATCACTCACTCCCAATCTCTATCTACCC   |
| Tfap2A B5 9  | ttgatggggatggaggagacATTTCACTTCATATCACTCACTCCCAATCTCTATCTACCC |
| Tfap2A B5 10 | catttttgactttgccctcATTTCACTTCATATCACTCACTCCCAATCTCTATCTACCC  |
| Tfap2A B5 11 | aggttcaaccctatctgtcATTTCACTTCATATCACTCACTCCCAATCTCTATCTACCC  |
| Tfap2A B5 12 | gtgagcaaggtgacattagcATTTCACTTCATATCACTCACTCCCAATCTCTATCTACCC |
| Tfap2A B5 13 | atctctagctagatgcactgATTTCACTTCATATCACTCACTCCCAATCTCTATCTACCC |
| Tfap2A B5 14 | ttctgtctcacaacgtaccATTTCACTTCATATCACTCACTCCCAATCTCTATCTACCC  |
| Tfap2A B5 15 | aattcagctactgcttggcATTTCACTTCATATCACTCACTCCCAATCTCTATCTACCC  |
| Tfap2A B5 16 | atcggaatgttgctggttgaATTTCACTTCATATCACTCACTCCCAATCTCTATCTACCC |
| Tfap2A B5 17 | ttttctgtgacttgctcgATTTCACTTCATATCACTCACTCCCAATCTCTATCTACCC   |
| Tfap2A B5 18 | ctgttttagctagaagcaATTTCACTTCATATCACTCACTCCCAATCTCTATCTACCC   |
| Tfap2A B5 19 | ggtcggtgaactctttacagATTTCACTTCATATCACTCACTCCCAATCTCTATCTACCC |
| Tfap2A B5 20 | cggctccaaaatggggttgATTTCACTTCATATCACTCACTCCCAATCTCTATCTACCC  |
| Tfap2A B5 21 | gagatgaggtgaagtgggATTTCACTTCATATCACTCACTCCCAATCTCTATCTACCC   |
| Tfap2A B5 22 | tcggtgagatagttctgcagATTTCACTTCATATCACTCACTCCCAATCTCTATCTACCC |
| Tfap2A B5 23 | gttgcaggtacatttgtATTTCACTTCATATCACTCACTCCCAATCTCTATCTACCC    |
| Tfap2A B5 24 | ctcttgtcgcctgttggATTTCACTTCATATCACTCACTCCCAATCTCTATCTACCC    |

### Hyb 3

|             |                                                               |
|-------------|---------------------------------------------------------------|
| Sox10 B1 1  | cgacagatcttggtcatcagTATAGCATTCTTTCTTGAGGAGGGCAGCAAACGGGAAGAG  |
| Sox10 B1 2  | gcagtggtggtcttcagaacTATAGCATTCTTTCTTGAGGAGGGCAGCAAACGGGAAGAG  |
| Sox10 B1 3  | gtgcgaagagttgtccgatgTATAGCATTCTTTCTTGAGGAGGGCAGCAAACGGGAAGAG  |
| Sox10 B1 4  | tgctctgttacttcattgTATAGCATTCTTTCTTGAGGAGGGCAGCAAACGGGAAGAG    |
| Sox10 B1 5  | caaggtcttactgagctcagTATAGCATTCTTTCTTGAGGAGGGCAGCAAACGGGAAGAG  |
| Sox10 B1 6  | tgtagtgcctggatagagTATAGCATTCTTTCTTGAGGAGGGCAGCAAACGGGAAGAG    |
| Sox10 B1 7  | tggtctgcacctgaagagtgTATAGCATTCTTTCTTGAGGAGGGCAGCAAACGGGAAGAG  |
| Sox10 B1 8  | ctcgctggagtcagcttggTATAGCATTCTTTCTTGAGGAGGGCAGCAAACGGGAAGAG   |
| Sox10 B1 9  | tccacattgccaaagtcaatTATAGCATTCTTTCTTGAGGAGGGCAGCAAACGGGAAGAG  |
| Sox10 B1 10 | acatcacttcatggctgacTATAGCATTCTTTCTTGAGGAGGGCAGCAAACGGGAAGAG   |
| Sox10 B1 11 | tgacgtcaaaggtctccatgTATAGCATTCTTTCTTGAGGAGGGCAGCAAACGGGAAGAG  |
| Sox10 B1 12 | gtggcaggtattgtcaaatTATAGCATTCTTTCTTGAGGAGGGCAGCAAACGGGAAGAG   |
| Sox10 B1 13 | ttggagatccaggctgagtgTATAGCATTCTTTCTTGAGGAGGGCAGCAAACGGGAAGAG  |
| Sox10 B1 14 | cggacaaggagactccatgcTATAGCATTCTTTCTTGAGGAGGGCAGCAAACGGGAAGAG  |
| Sox10 B1 15 | ttttcacctgggcttggagTATAGCATTCTTTCTTGAGGAGGGCAGCAAACGGGAAGAG   |
| Sox10 B1 16 | ctgatcgggtgaatgacctcTATAGCATTCTTTCTTGAGGAGGGCAGCAAACGGGAAGAG  |
| Sox10 B1 17 | gatgtgaagctatctgggaTATAGCATTCTTTCTTGAGGAGGGCAGCAAACGGGAAGAG   |
| Sox10 B1 18 | aaccatagtgggcagactcTATAGCATTCTTTCTTGAGGAGGGCAGCAAACGGGAAGAG   |
| Sox10 B1 19 | ggtggtctggatagtcaaacTATAGCATTCTTTCTTGAGGAGGGCAGCAAACGGGAAGAG  |
| Sox10 B1 20 | aaggcagagtagaggccagaTATAGCATTCTTTCTTGAGGAGGGCAGCAAACGGGAAGAG  |
| Sox10 B1 21 | ctgggaaggtcccatataggTATAGCATTCTTTCTTGAGGAGGGCAGCAAACGGGAAGAG  |
| Sox10 B1 22 | ggtcagagatggcagtgtaaTATAGCATTCTTTCTTGAGGAGGGCAGCAAACGGGAAGAG  |
| Sox10 B1 23 | caatgtgtgggactatgggaTATAGCATTCTTTCTTGAGGAGGGCAGCAAACGGGAAGAG  |
| Sox10 B1 24 | agagagtcgtatacacaggcTATAGCATTCTTTCTTGAGGAGGGCAGCAAACGGGAAGAG  |
| Pax7 B2 1   | gtggacacttccaaagggaaAAAAAGCTCAGTCCATCCTCGTAAATCCTCATCAATCATC  |
| Pax7 B2 2   | ttgatgaaaacccctccgagAAAAAGCTCAGTCCATCCTCGTAAATCCTCATCAATCATC  |
| Pax7 B2 3   | acgatcttatggcgatgtgAAAAAGCTCAGTCCATCCTCGTAAATCCTCATCAATCATC   |
| Pax7 B2 4   | atgcgtagcacacggctaataAAAAAGCTCAGTCCATCCTCGTAAATCCTCATCAATCATC |
| Pax7 B2 5   | aggatgccatctatgctgtgAAAAAGCTCAGTCCATCCTCGTAAATCCTCATCAATCATC  |
| Pax7 B2 6   | gttctgattcgacatcgagAAAAAGCTCAGTCCATCCTCGTAAATCCTCATCAATCATC   |

|             |                                                               |
|-------------|---------------------------------------------------------------|
| Pax7 B2 7   | tgcttctcttcaaaggcagAAAAAGCTCAGTCCATCCTCGTAAATCCTCATCAATCATC   |
| Pax7 B2 8   | ctgctcggcagtgaagtggAAAAAGCTCAGTCCATCCTCGTAAATCCTCATCAATCATC   |
| Pax7 B2 9   | ctgaaccacacctgaacacgAAAAAGCTCAGTCCATCCTCGTAAATCCTCATCAATCATC  |
| Pax7 B2 10  | agatggttgatgctgcgagAAAAAGCTCAGTCCATCCTCGTAAATCCTCATCAATCATC   |
| Pax7 B2 11  | catggtggatggtggcaaggAAAAAGCTCAGTCCATCCTCGTAAATCCTCATCAATCATC  |
| Pax7 B2 12  | cataggcagagctggagtcgAAAAAGCTCAGTCCATCCTCGTAAATCCTCATCAATCATC  |
| Pax7 B2 13  | agcattcatgaagctgtctgAAAAAGCTCAGTCCATCCTCGTAAATCCTCATCAATCATC  |
| Pax7 B2 14  | attcatgtggttgccaggagAAAAAGCTCAGTCCATCCTCGTAAATCCTCATCAATCATC  |
| Pax7 B2 15  | gagagaggccattgctaacaAAAAAGCTCAGTCCATCCTCGTAAATCCTCATCAATCATC  |
| Pax7 B2 16  | gagcactgcatctgtttgAAAAAGCTCAGTCCATCCTCGTAAATCCTCATCAATCATC    |
| Pax7 B2 17  | tcaaggctatggtgaggttcAAAAAGCTCAGTCCATCCTCGTAAATCCTCATCAATCATC  |
| Pax7 B2 18  | aggatgctcatcacctgattAAAAAGCTCAGTCCATCCTCGTAAATCCTCATCAATCATC  |
| Pax7 B2 19  | cagagatggagttggtggtgAAAAAGCTCAGTCCATCCTCGTAAATCCTCATCAATCATC  |
| Pax7 B2 20  | cacggacttgatggagtcacAAAAAGCTCAGTCCATCCTCGTAAATCCTCATCAATCATC  |
| Pax7 B2 21  | tgtactggtggtgctgtagAAAAAGCTCAGTCCATCCTCGTAAATCCTCATCAATCATC   |
| Pax7 B2 22  | gctcacgttctgtgcaaatAAAAAGCTCAGTCCATCCTCGTAAATCCTCATCAATCATC   |
| Pax7 B2 23  | cagaacggccgaatgttctcAAAAAGCTCAGTCCATCCTCGTAAATCCTCATCAATCATC  |
| Pax7 B2 24  | ctgtctactgttaggagcAAAAAGCTCAGTCCATCCTCGTAAATCCTCATCAATCATC    |
| Nanog B3 1  | ctaacagagccgtaggacggTAAAAAGTCTAATCCGTCCCTGCCTCTATATCTCCACTC   |
| Nanog B3 2  | ttttctgctgtggtcaagTAAAAAGTCTAATCCGTCCCTGCCTCTATATCTCCACTC     |
| Nanog B3 3  | gaagaagctggagaggcatcTAAAAAGTCTAATCCGTCCCTGCCTCTATATCTCCACTC   |
| Nanog B3 4  | gtatactgaatgagtgtcccTAAAAAGTCTAATCCGTCCCTGCCTCTATATCTCCACTC   |
| Nanog B3 5  | cagtagggctagtggcagagTAAAAAGTCTAATCCGTCCCTGCCTCTATATCTCCACTC   |
| Nanog B3 6  | aaaagtggggcgggtgagatgTAAAAAGTCTAATCCGTCCCTGCCTCTATATCTCCACTC  |
| Nanog B3 7  | ctctcacctttatcctaacTAAAAAGTCTAATCCGTCCCTGCCTCTATATCTCCACTC    |
| Nanog B3 8  | agaaagctgtgcgctcttgTAAAAAGTCTAATCCGTCCCTGCCTCTATATCTCCACTC    |
| Nanog B3 9  | gataaatccctttatccaccTAAAAAGTCTAATCCGTCCCTGCCTCTATATCTCCACTC   |
| Nanog B3 10 | tgatgaaccattctgtggTAAAAAGTCTAATCCGTCCCTGCCTCTATATCTCCACTC     |
| Nanog B3 11 | ggtcatatccagatacgagTAAAAAGTCTAATCCGTCCCTGCCTCTATATCTCCACTC    |
| Nanog B3 12 | ggaagccctggtgaaatgtaTAAAAAGTCTAATCCGTCCCTGCCTCTATATCTCCACTC   |
| Nanog B3 13 | gaaggtttctgttgcaacaTAAAAAGTCTAATCCGTCCCTGCCTCTATATCTCCACTC    |
| Nanog B3 14 | aagtctggccactgctgtaaTAAAAAGTCTAATCCGTCCCTGCCTCTATATCTCCACTC   |
| Nanog B3 15 | cacagccatgaacggatacaTAAAAAGTCTAATCCGTCCCTGCCTCTATATCTCCACTC   |
| Nanog B3 16 | gttccaccttttcaaagaaTAAAAAGTCTAATCCGTCCCTGCCTCTATATCTCCACTC    |
| Nanog B3 17 | gacttaataaacccatggccTAAAAAGTCTAATCCGTCCCTGCCTCTATATCTCCACTC   |
| Nanog B3 18 | gccatgatagaagttcatctTAAAAAGTCTAATCCGTCCCTGCCTCTATATCTCCACTC   |
| Nanog B3 19 | tgtcataatccacattggtatTAAAAAGTCTAATCCGTCCCTGCCTCTATATCTCCACTC  |
| Nanog B3 20 | taggtatcttctgcctgcaaTAAAAAGTCTAATCCGTCCCTGCCTCTATATCTCCACTC   |
| Nanog B3 21 | tatcagaggtgctctggaagTAAAAAGTCTAATCCGTCCCTGCCTCTATATCTCCACTC   |
| Nanog B3 22 | gagctcgagaactgtgtgatTAAAAAGTCTAATCCGTCCCTGCCTCTATATCTCCACTC   |
| Nanog B3 23 | ctggtactgatgccgtacagTAAAAAGTCTAATCCGTCCCTGCCTCTATATCTCCACTC   |
| Nanog B3 24 | agtctcataaccattctgggTAAAAAGTCTAATCCGTCCCTGCCTCTATATCTCCACTC   |
| Sox2 B4 1   | ttcagctcggtttccatcatATTTACATTTACAGACCTCAACCTACCTCCAACCTCTCAC  |
| Sox2 B4 2   | tgttctctggttggtcgcgATTTACATTTACAGACCTCAACCTACCTCCAACCTCTCAC   |
| Sox2 B4 3   | ataaaagtttccactcggccATTTACATTTACAGACCTCAACCTACCTCCAACCTCTCAC  |
| Sox2 B4 4   | cttcgtcaatgaagggtctcATTTACATTTACAGACCTCAACCTACCTCCAACCTCTCAC  |
| Sox2 B4 5   | ttcatgtgcagagctcgagATTTACATTTACAGACCTCAACCTACCTCCAACCTCTCAC   |
| Sox2 B4 6   | ttcatcagggtcttggtttATTTACATTTACAGACCTCAACCTACCTCCAACCTCTCAC   |
| Sox2 B4 7   | ctggcaacgtgtacttatccATTTACATTTACAGACCTCAACCTACCTCCAACCTCTCAC  |
| Sox2 B4 8   | cggctcgtcatggtattggtgATTTACATTTACAGACCTCAACCTACCTCCAACCTCTCAC |
| Sox2 B4 9   | ttcatgtgcgctaactgtcATTTACATTTACAGACCTCAACCTACCTCCAACCTCTCAC   |
| Sox2 B4 10  | ctggtcatggagttgtactgATTTACATTTACAGACCTCAACCTACCTCCAACCTCTCAC  |
| Sox2 B4 11  | gatccgttcatgtacgtctgATTTACATTTACAGACCTCAACCTACCTCCAACCTCTCAC  |
| Sox2 B4 12  | gtacgacatgctgtaggtagATTTACATTTACAGACCTCAACCTACCTCCAACCTCTCAC  |
| Sox2 B4 13  | gagctggattccgtcttgacATTTACATTTACAGACCTCAACCTACCTCCAACCTCTCAC  |
| Sox2 B4 14  | ctcgaatgagacgaggaggtATTTACATTTACAGACCTCAACCTACCTCCAACCTCTCAC  |
| Sox2 B4 15  | gatacatgtgatcatgtccATTTACATTTACAGACCTCAACCTACCTCCAACCTCTCAC   |
| Sox2 B4 16  | tggttctgttacttcagcacATTTACATTTACAGACCTCAACCTACCTCCAACCTCTCAC  |
| Sox2 B4 17  | catatgaagtctgcttggggATTTACATTTACAGACCTCAACCTACCTCCAACCTCTCAC  |



|             |                                                              |
|-------------|--------------------------------------------------------------|
| Sox2 B4 18  | gtgcactctggtagtggtgATTTACATTTACAGACCTCAACCTACCTCCAACTCTCAC   |
| Sox2 B4 19  | ttaatggctgtgccaggaacATTTACATTTACAGACCTCAACCTACCTCCAACTCTCAC  |
| Sox2 B4 20  | atgtgatagagggagtggtgcATTTACATTTACAGACCTCAACCTACCTCCAACTCTCAC |
| Snai2 B5 1  | gtttcttgaccaggaaggagATTTCACTTCATATCACTCACTCCCAATCTCTATCTACCC |
| Snai2 B5 2  | tagtttgcttcttgatgaATTTCACTTCATATCACTCACTCCCAATCTCTATCTACCC   |
| Snai2 B5 3  | atcactgtatgagtgtccagATTTCACTTCATATCACTCACTCCCAATCTCTATCTACCC |
| Snai2 B5 4  | agctttcatacaggtatgggATTTCACTTCATATCACTCACTCCCAATCTCTATCTACCC |
| Snai2 B5 5  | ctgcggtatgataggactgATTTCACTTCATATCACTCACTCCCAATCTCTATCTACCC  |
| Snai2 B5 6  | tgaagctacagagctcaggATTTCACTTCATATCACTCACTCCCAATCTCTATCTACCC  |
| Snai2 B5 7  | gtagtccacacagtaatgggATTTCACTTCATATCACTCACTCCCAATCTCTATCTACCC |
| Snai2 B5 8  | attgggtagaggagacggtaATTTCACTTCATATCACTCACTCCCAATCTCTATCTACCC |
| Snai2 B5 9  | atccagaaagcggagagaggATTTCACTTCATATCACTCACTCCCAATCTCTATCTACCC |
| Snai2 B5 10 | tgacccttccaaagatgagATTTCACTTCATATCACTCACTCCCAATCTCTATCTACCC  |
| Snai2 B5 11 | tgatctttggaggaggtgtcATTTCACTTCATATCACTCACTCCCAATCTCTATCTACCC |
| Snai2 B5 12 | aatgggacttttgaaccgcATTTCACTTCATATCACTCACTCCCAATCTCTATCTACCC  |
| Snai2 B5 13 | atgagggtctgaaagcttgATTTCACTTCATATCACTCACTCCCAATCTCTATCTACCC  |
| Snai2 B5 14 | ctgaaacttttcggcttcgaATTTCACTTCATATCACTCACTCCCAATCTCTATCTACCC |
| Snai2 B5 15 | ttggccaacccagagaaagATTTCACTTCATATCACTCACTCCCAATCTCTATCTACCC  |
| Snai2 B5 16 | aggctgacatactcctgtcATTTCACTTCATATCACTCACTCCCAATCTCTATCTACCC  |
| Snai2 B5 17 | atcttcagacgcaaggtagATTTCACTTCATATCACTCACTCCCAATCTCTATCTACCC  |
| Snai2 B5 18 | agggtctggagaaagccttgATTTCACTTCATATCACTCACTCCCAATCTCTATCTACCC |
| Snai2 B5 19 | ctgatgtgcccttgaagtagATTTCACTTCATATCACTCACTCCCAATCTCTATCTACCC |
| Snai2 B5 20 | gaaagccctgttgacgtgagATTTCACTTCATATCACTCACTCCCAATCTCTATCTACCC |
| Snai2 B5 21 | atgagccctcagattggatcATTTCACTTCATATCACTCACTCCCAATCTCTATCTACCC |
| Snai2 B5 22 | gtatttctcacatccgagtATTTCACTTCATATCACTCACTCCCAATCTCTATCTACCC  |
| Snai2 B5 23 | gcagaagagacattctggagATTTCACTTCATATCACTCACTCCCAATCTCTATCTACCC |
| Snai2 B5 24 | cagccagattcctcatgtttATTTCACTTCATATCACTCACTCCCAATCTCTATCTACCC |

#### Hyb 4

|            |                                                              |
|------------|--------------------------------------------------------------|
| MycN B1 1  | cgggttcttgctgatcattcTATAGCATTCTTTCTTGAGGAGGGCAGCAAACGGGAAGAG |
| MycN B1 2  | ggctgtaaggaatcgaactcTATAGCATTCTTTCTTGAGGAGGGCAGCAAACGGGAAGAG |
| MycN B1 3  | atcttcgtccggtagaaacTATAGCATTCTTTCTTGAGGAGGGCAGCAAACGGGAAGAG  |
| MycN B1 4  | ccggcccgcataaataaaaaTATAGCATTCTTTCTTGAGGAGGGCAGCAAACGGGAAGAG |
| MycN B1 5  | caggaggagcaactcggacgTATAGCATTCTTTCTTGAGGAGGGCAGCAAACGGGAAGAG |
| MycN B1 6  | aggcccgctcgaagaatacTATAGCATTCTTTCTTGAGGAGGGCAGCAAACGGGAAGAG  |
| MycN B1 7  | ggagttgagattgtgctcgTATAGCATTCTTTCTTGAGGAGGGCAGCAAACGGGAAGAG  |
| MycN B1 8  | ttgacggggaagggaagacTATAGCATTCTTTCTTGAGGAGGGCAGCAAACGGGAAGAG  |
| MycN B1 9  | ctccactgtcacaacatctaTATAGCATTCTTTCTTGAGGAGGGCAGCAAACGGGAAGAG |
| MycN B1 10 | tgttgaggaggagcgtcttTATAGCATTCTTTCTTGAGGAGGGCAGCAAACGGGAAGAG  |
| MycN B1 11 | atagtggggtgtaacagcTATAGCATTCTTTCTTGAGGAGGGCAGCAAACGGGAAGAG   |
| MycN B1 12 | ggtatttttaggacgactgTATAGCATTCTTTCTTGAGGAGGGCAGCAAACGGGAAGAG  |
| MycN B1 13 | gtgtcctgaccgatggaaaaTATAGCATTCTTTCTTGAGGAGGGCAGCAAACGGGAAGAG |
| MycN B1 14 | ataattatgctgctggtgaaTATAGCATTCTTTCTTGAGGAGGGCAGCAAACGGGAAGAG |
| MycN B1 15 | ccatatacggagaaggagcgTATAGCATTCTTTCTTGAGGAGGGCAGCAAACGGGAAGAG |
| MycN B1 16 | cacctcggcttttaactttTATAGCATTCTTTCTTGAGGAGGGCAGCAAACGGGAAGAG  |
| MycN B1 17 | tgaactcttagactttggtTATAGCATTCTTTCTTGAGGAGGGCAGCAAACGGGAAGAG  |
| MycN B1 18 | ttatggttacgtcgacgttcTATAGCATTCTTTCTTGAGGAGGGCAGCAAACGGGAAGAG |
| MycN B1 19 | agatcattacgcctctgacgTATAGCATTCTTTCTTGAGGAGGGCAGCAAACGGGAAGAG |
| MycN B1 20 | taacgtgaggaaactggaccTATAGCATTCTTTCTTGAGGAGGGCAGCAAACGGGAAGAG |
| MycN B1 21 | acaagttctggaacgtggtcTATAGCATTCTTTCTTGAGGAGGGCAGCAAACGGGAAGAG |
| MycN B1 22 | cacaacttttcagctttctTATAGCATTCTTTCTTGAGGAGGGCAGCAAACGGGAAGAG  |
| MycN B1 23 | ggacatattcagtggctttTATAGCATTCTTTCTTGAGGAGGGCAGCAAACGGGAAGAG  |
| MycN B1 24 | aagtcgctgtactctattTATAGCATTCTTTCTTGAGGAGGGCAGCAAACGGGAAGAG   |
| Ets1 B2 1  | tctgatgatggtcaggggAAAAAGCTCAGTCCATCCTCGTAAATCCTCATCAATCATC   |
| Ets1 B2 2  | ggacgggaagagatcgtatAAAAAGCTCAGTCCATCCTCGTAAATCCTCATCAATCATC  |
| Ets1 B2 3  | agtgcctgagacatcattcAAAAAGCTCAGTCCATCCTCGTAAATCCTCATCAATCATC  |
| Ets1 B2 4  | ctttgcgaagccactgaaggAAAAAGCTCAGTCCATCCTCGTAAATCCTCATCAATCATC |
| Ets1 B2 5  | ctgggatctttggggattcAAAAAGCTCAGTCCATCCTCGTAAATCCTCATCAATCATC  |
| Ets1 B2 6  | tgaactcattcactgccacAAAAAGCTCAGTCCATCCTCGTAAATCCTCATCAATCATC  |

|            |                                                               |
|------------|---------------------------------------------------------------|
| Ets1 B2 7  | cagctccgttcacgcagaacAAAAAGCTCAGTCCATCCTCGTAAATCCTCATCAATCATC  |
| Ets1 B2 8  | acaaagtcaggccgtagctcAAAAAGCTCAGTCCATCCTCGTAAATCCTCATCAATCATC  |
| Ets1 B2 9  | agggtgtcccaaaggatataAAAAAGCTCAGTCCATCCTCGTAAATCCTCATCAATCATC  |
| Ets1 B2 10 | tctggatacgtgcattcacAAAAAGCTCAGTCCATCCTCGTAAATCCTCATCAATCATC   |
| Ets1 B2 11 | gtagtctgaagtagcgaggAAAAAGCTCAGTCCATCCTCGTAAATCCTCATCAATCATC   |
| Ets1 B2 12 | gtgctcgatgccataactaaAAAAAGCTCAGTCCATCCTCGTAAATCCTCATCAATCATC  |
| Ets1 B2 13 | ctgagggatagtcgttctcgAAAAAGCTCAGTCCATCCTCGTAAATCCTCATCAATCATC  |
| Ets1 B2 14 | agtagtctgtcgcaggagAAAAAGCTCAGTCCATCCTCGTAAATCCTCATCAATCATC    |
| Ets1 B2 15 | cagtttacctcgactggcacAAAAAGCTCAGTCCATCCTCGTAAATCCTCATCAATCATC  |
| Ets1 B2 16 | aggctctggaaggaggactgAAAAAGCTCAGTCCATCCTCGTAAATCCTCATCAATCATC  |
| Ets1 B2 17 | tcctctgagtcgaaagctatcAAAAAGCTCAGTCCATCCTCGTAAATCCTCATCAATCATC |
| Ets1 B2 18 | cgatctcgaacatagtccttAAAAAGCTCAGTCCATCCTCGTAAATCCTCATCAATCATC  |
| Ets1 B2 19 | gaatgacaggctgtccttgAAAAAGCTCAGTCCATCCTCGTAAATCCTCATCAATCATC   |
| Ets1 B2 20 | cgtccagcttatgaaggactAAAAAGCTCAGTCCATCCTCGTAAATCCTCATCAATCATC  |
| Ets1 B2 21 | acctcatctggatcggaagAAAAAGCTCAGTCCATCCTCGTAAATCCTCATCAATCATC   |
| Ets1 B2 22 | tgggctgttttctcttgAAAAAGCTCAGTCCATCCTCGTAAATCCTCATCAATCATC     |
| Ets1 B2 23 | cgtaatagtaacgcagaccaAAAAAGCTCAGTCCATCCTCGTAAATCCTCATCAATCATC  |
| Ets1 B2 24 | cagacgaagcggtagacgtaAAAAAGCTCAGTCCATCCTCGTAAATCCTCATCAATCATC  |
| Pax6 B3 1  | cgagttccacgatcttctgcTAAAAAAGTCTAATCCGTCCCTGCCTCTATATCTCCACTC  |
| Pax6 B3 2  | tccattcgacacgttttgatTAAAAAAGTCTAATCCGTCCCTGCCTCTATATCTCCACTC  |
| Pax6 B3 3  | cctgcccataattttactcaTAAAAAAGTCTAATCCGTCCCTGCCTCTATATCTCCACTC  |
| Pax6 B3 4  | tgatggagccagtttcgtaaTAAAAAAGTCTAATCCGTCCCTGCCTCTATATCTCCACTC  |
| Pax6 B3 5  | tactctcggttactactctTAAAAAAGTCTAATCCGTCCCTGCCTCTATATCTCCACTC   |
| Pax6 B3 6  | tctcgttatactgcgctatTAAAAAAGTCTAATCCGTCCCTGCCTCTATATCTCCACTC   |
| Pax6 B3 7  | tctcccacgcaaagatggagTAAAAAAGTCTAATCCGTCCCTGCCTCTATATCTCCACTC  |
| Pax6 B3 8  | tccgagagtaatctgtctgTAAAAAAGTCTAATCCGTCCCTGCCTCTATATCTCCACTC   |
| Pax6 B3 9  | ggactctgtttatcgacgacTAAAAAAGTCTAATCCGTCCCTGCCTCTATATCTCCACTC  |
| Pax6 B3 10 | catctgtgtctttcgtagTAAAAAAGTCTAATCCGTCCCTGCCTCTATATCTCCACTC    |
| Pax6 B3 11 | atccttagcttgcgtacatTAAAAAAGTCTAATCCGTCCCTGCCTCTATATCTCCACTC   |
| Pax6 B3 12 | catcggaatcttccccattgTAAAAAAGTCTAATCCGTCCCTGCCTCTATATCTCCACTC  |
| Pax6 B3 13 | ttcgatttgctcttggttaaTAAAAAAGTCTAATCCGTCCCTGCCTCTATATCTCCACTC  |
| Pax6 B3 14 | tctcgcaaacacatcaggatTAAAAAAGTCTAATCCGTCCCTGCCTCTATATCTCCACTC  |
| Pax6 B3 15 | ctattttagcagtagtcgcTAAAAAAGTCTAATCCGTCCCTGCCTCTATATCTCCACTC   |
| Pax6 B3 16 | ttggccctctgttagaaaaTAAAAAAGTCTAATCCGTCCCTGCCTCTATATCTCCACTC   |
| Pax6 B3 17 | aactactgctgaggggatgTAAAAAAGTCTAATCCGTCCCTGCCTCTATATCTCCACTC   |
| Pax6 B3 18 | tgtgggatcggtggttaaacTAAAAAAGTCTAATCCGTCCCTGCCTCTATATCTCCACTC  |
| Pax6 B3 19 | aagaggaaacgggggtggtcTAAAAAAGTCTAATCCGTCCCTGCCTCTATATCTCCACTC  |
| Pax6 B3 20 | cccaacatggaacctgatgTAAAAAAGTCTAATCCGTCCCTGCCTCTATATCTCCACTC   |
| Pax6 B3 21 | gttgcatagcgaggtgttgTAAAAAAGTCTAATCCGTCCCTGCCTCTATATCTCCACTC   |
| Pax6 B3 22 | ctattcatgtgtctgcatTAAAAAAGTCTAATCCGTCCCTGCCTCTATATCTCCACTC    |
| Pax6 B3 23 | agacatgtcaggttcactgcTAAAAAAGTCTAATCCGTCCCTGCCTCTATATCTCCACTC  |
| Pax6 B3 24 | actgtaatcttggccaatacTAAAAAAGTCTAATCCGTCCCTGCCTCTATATCTCCACTC  |
| PouV B4 1  | ccatttacacattcgagcaATTTACATTTACAGACCTCAACCTACCTCCAACCTCTCAC   |
| PouV B4 2  | gggcatttcgaatcctttaATTTACATTTACAGACCTCAACCTACCTCCAACCTCTCAC   |
| PouV B4 3  | gagataccgcggtgacaacATTTACATTTACAGACCTCAACCTACCTCCAACCTCTCAC   |
| PouV B4 4  | aggcagacacgcggtgaatgATTTACATTTACAGACCTCAACCTACCTCCAACCTCTCAC  |
| PouV B4 5  | ttgaggtccttggcaaacgATTTACATTTACAGACCTCAACCTACCTCCAACCTCTCAC   |
| PouV B4 6  | gagtgaagcccagcatgatATTTACATTTACAGACCTCAACCTACCTCCAACCTCTCAC   |
| PouV B4 7  | tgaacatctcccatagagcATTTACATTTACAGACCTCAACCTACCTCCAACCTCTCAC   |
| PouV B4 8  | tgagctggagagcttgaagATTTACATTTACAGACCTCAACCTACCTCCAACCTCTCAC   |
| PouV B4 9  | tcattgagccaacgctgcagATTTACATTTACAGACCTCAACCTACCTCCAACCTCTCAC  |
| PouV B4 10 | catgttgccgtgttctctgATTTACATTTACAGACCTCAACCTACCTCCAACCTCTCAC   |
| PouV B4 11 | actgtctctgcattgcacatATTTACATTTACAGACCTCAACCTACCTCCAACCTCTCAC  |
| PouV B4 12 | tcacgttggtctcgatgctgATTTACATTTACAGACCTCAACCTACCTCCAACCTCTCAC  |
| PouV B4 13 | gaagaagctctcagcggtcATTTACATTTACAGACCTCAACCTACCTCCAACCTCTCAC   |
| PouV B4 14 | gactgggcttcacacattgATTTACATTTACAGACCTCAACCTACCTCCAACCTCTCAC   |
| PouV B4 15 | tcagcgatctgggagatctcATTTACATTTACAGACCTCAACCTACCTCCAACCTCTCAC  |
| PouV B4 16 | aacgtctttgtccaggttgaATTTACATTTACAGACCTCAACCTACCTCCAACCTCTCAC  |
| PouV B4 17 | tggttcattgctgatcatcacATTTACATTTACAGACCTCAACCTACCTCCAACCTCTCAC |

|            |                                                                |
|------------|----------------------------------------------------------------|
| PouV B4 18 | ctgggatgtcactgggatggATTTCACATTTACAGACCTCAACCTACCTCCAACCTCTCAC  |
| PouV B4 19 | gaaaggtggcatgtagacggATTTCACATTTACAGACCTCAACCTACCTCCAACCTCTCAC  |
| PouV B4 20 | tgctgtgttcacatggagatcATTTCACATTTACAGACCTCAACCTACCTCCAACCTCTCAC |
| Msx1 B5 1  | cggtggatcatgtccgcagATTTCACATTCATATCACTCACTCCCAATCTCTATCTACCC   |
| Msx1 B5 2  | ttgctgaaggcggagggcATTTCACATTCATATCACTCACTCCCAATCTCTATCTACCC    |
| Msx1 B5 3  | tgggtttgtcgtctcctATTTCACATTCATATCACTCACTCCCAATCTCTATCTACCC     |
| Msx1 B5 4  | cagcggggaaggggacacATTTCACATTCATATCACTCACTCCCAATCTCTATCTACCC    |
| Msx1 B5 5  | agcgctccacgctgaagATTTCACATTCATATCACTCACTCCCAATCTCTATCTACCC     |
| Msx1 B5 6  | gtcagagcgccgaggttgATTTCACATTCATATCACTCACTCCCAATCTCTATCTACCC    |
| Msx1 B5 7  | cgagaggcagcgcgacgATTTCACATTCATATCACTCACTCCCAATCTCTATCTACCC     |
| Msx1 B5 8  | cgacggagcgggaagtggcATTTCACATTCATATCACTCACTCCCAATCTCTATCTACCC   |
| Msx1 B5 9  | tctctgctttgagcagcATTTCACATTCATATCACTCACTCCCAATCTCTATCTACCC     |
| Msx1 B5 10 | cgagaagcgggggctctgATTTCACATTCATATCACTCACTCCCAATCTCTATCTACCC    |
| Msx1 B5 11 | tgttgctctgtgcttgATTTCACATTCATATCACTCACTCCCAATCTCTATCTACCC      |
| Msx1 B5 12 | agctggagaactcggcacATTTCACATTCATATCACTCACTCCCAATCTCTATCTACCC    |
| Msx1 B5 13 | gaatgcagcagggcggagATTTCACATTCATATCACTCACTCCCAATCTCTATCTACCC    |
| Msx1 B5 14 | gccaacgggaaggagatATTTCACATTCATATCACTCACTCCCAATCTCTATCTACCC     |
| Msx1 B5 15 | ctccgtacagggatgcgcATTTCACATTCATATCACTCACTCCCAATCTCTATCTACCC    |
| Msx1 B5 16 | tcgctggaaggggctggaATTTCACATTCATATCACTCACTCCCAATCTCTATCTACCC    |
| Msx1 B5 17 | gtgtacagtcccacaggATTTCACATTCATATCACTCACTCCCAATCTCTATCTACCC     |
| Msx1 B5 18 | tactatatcccacgtgcgATTTCACATTCATATCACTCACTCCCAATCTCTATCTACCC    |

## Hyb 5

|              |                                                               |
|--------------|---------------------------------------------------------------|
| Axud1 B1 1   | gagcagtaggtgctgtcatcTATAGCATTCTTTCTTGAGGAGGGCAGCAAACGCGGAAGAG |
| Axud1 B1 2   | ggtaaagccaggtgtatggTATAGCATTCTTTCTTGAGGAGGGCAGCAAACGCGGAAGAG  |
| Axud1 B1 3   | cgtttgattttcaggatTATAGCATTCTTTCTTGAGGAGGGCAGCAAACGCGGAAGAG    |
| Axud1 B1 4   | caactccacgtgttcttcTATAGCATTCTTTCTTGAGGAGGGCAGCAAACGCGGAAGAG   |
| Axud1 B1 5   | gcgtgggaagtagaacacagTATAGCATTCTTTCTTGAGGAGGGCAGCAAACGCGGAAGAG |
| Axud1 B1 6   | gaactctgtaacgtgaactTATAGCATTCTTTCTTGAGGAGGGCAGCAAACGCGGAAGAG  |
| Axud1 B1 7   | cgacgaatgtttcctgctcTATAGCATTCTTTCTTGAGGAGGGCAGCAAACGCGGAAGAG  |
| Axud1 B1 8   | tttgctccatcatgtgagTATAGCATTCTTTCTTGAGGAGGGCAGCAAACGCGGAAGAG   |
| Axud1 B1 9   | gagatgtcctaagtgtgagTATAGCATTCTTTCTTGAGGAGGGCAGCAAACGCGGAAGAG  |
| Axud1 B1 10  | cattgtcagctcaatgtcaTATAGCATTCTTTCTTGAGGAGGGCAGCAAACGCGGAAGAG  |
| Axud1 B1 11  | tggaggaaaagccatcctcTATAGCATTCTTTCTTGAGGAGGGCAGCAAACGCGGAAGAG  |
| Axud1 B1 12  | cctcctgtcaatctcttcTATAGCATTCTTTCTTGAGGAGGGCAGCAAACGCGGAAGAG   |
| Axud1 B1 13  | agacctctgacagtcacagTATAGCATTCTTTCTTGAGGAGGGCAGCAAACGCGGAAGAG  |
| Axud1 B1 14  | ttgtacagccacaggggaagTATAGCATTCTTTCTTGAGGAGGGCAGCAAACGCGGAAGAG |
| Axud1 B1 15  | ctggttgaaactgatcctgcTATAGCATTCTTTCTTGAGGAGGGCAGCAAACGCGGAAGAG |
| Axud1 B1 16  | aagccatcgtcatcgtatgcTATAGCATTCTTTCTTGAGGAGGGCAGCAAACGCGGAAGAG |
| Axud1 B1 17  | atcgttgaaagtgaggatgcTATAGCATTCTTTCTTGAGGAGGGCAGCAAACGCGGAAGAG |
| Axud1 B1 18  | actcagagaggtgggatgagTATAGCATTCTTTCTTGAGGAGGGCAGCAAACGCGGAAGAG |
| Axud1 B1 19  | tagctcttggaacacgactcTATAGCATTCTTTCTTGAGGAGGGCAGCAAACGCGGAAGAG |
| Axud1 B1 20  | gtccgagaaggactggaagaTATAGCATTCTTTCTTGAGGAGGGCAGCAAACGCGGAAGAG |
| Axud1 B1 21  | agttgtaaaggggtcccaagTATAGCATTCTTTCTTGAGGAGGGCAGCAAACGCGGAAGAG |
| Axud1 B1 22  | tcaaggttctcactactcttTATAGCATTCTTTCTTGAGGAGGGCAGCAAACGCGGAAGAG |
| Axud1 B1 23  | ctgaaactgtaacgtgagaTATAGCATTCTTTCTTGAGGAGGGCAGCAAACGCGGAAGAG  |
| Axud1 B1 24  | gcgggaaaccggggaattaTATAGCATTCTTTCTTGAGGAGGGCAGCAAACGCGGAAGAG  |
| Tfap2B B2 1  | acattttcaaccagttccaAAAAAGCTCAGTCCATCCTCGTAAATCCTCATCAATCATC   |
| Tfap2B B2 2  | gtcctcatagatatctcgtAAAAAGCTCAGTCCATCCTCGTAAATCCTCATCAATCATC   |
| Tfap2B B2 3  | gaggacggggtgtgagagagAAAAAGCTCAGTCCATCCTCGTAAATCCTCATCAATCATC  |
| Tfap2B B2 4  | taggggggtgggaataaggAAAAAGCTCAGTCCATCCTCGTAAATCCTCATCAATCATC   |
| Tfap2B B2 5  | tggctttggtgtaagggaagAAAAAGCTCAGTCCATCCTCGTAAATCCTCATCAATCATC  |
| Tfap2B B2 6  | ggatcattgacatgggagtaaAAAAAGCTCAGTCCATCCTCGTAAATCCTCATCAATCATC |
| Tfap2B B2 7  | gttgatgcaaggggttaggAAAAAGCTCAGTCCATCCTCGTAAATCCTCATCAATCATC   |
| Tfap2B B2 8  | gttcataccgctgtattggAAAAAGCTCAGTCCATCCTCGTAAATCCTCATCAATCATC   |
| Tfap2B B2 9  | ttttaatgacagactgtgccAAAAAGCTCAGTCCATCCTCGTAAATCCTCATCAATCATC  |
| Tfap2B B2 10 | gccatctttattcatcatcaAAAAAGCTCAGTCCATCCTCGTAAATCCTCATCAATCATC  |
| Tfap2B B2 11 | ggtgttgacggaaattccacAAAAAGCTCAGTCCATCCTCGTAAATCCTCATCAATCATC  |
| Tfap2B B2 12 | ccactgttacttgtacttgAAAAAGCTCAGTCCATCCTCGTAAATCCTCATCAATCATC   |

|              |                                                              |
|--------------|--------------------------------------------------------------|
| Tfap2B B2 13 | tagcctttctcgcaagatcAAAAAGCTCAGTCCATCCTCGTAAATCCTCATCAATCATC  |
| Tfap2B B2 14 | aaagtgcatttgcagccttAAAAAGCTCAGTCCATCCTCGTAAATCCTCATCAATCATC  |
| Tfap2B B2 15 | ttttcctggagtgagggtcAAAAAGCTCAGTCCATCCTCGTAAATCCTCATCAATCATC  |
| Tfap2B B2 16 | aagttgctttagcaagcaAAAAAGCTCAGTCCATCCTCGTAAATCCTCATCAATCATC   |
| Tfap2B B2 17 | ggccaagagatctgtaaattAAAAAGCTCAGTCCATCCTCGTAAATCCTCATCAATCATC |
| Tfap2B B2 18 | tgtttccaatgggtgcctgAAAAAGCTCAGTCCATCCTCGTAAATCCTCATCAATCATC  |
| Tfap2B B2 19 | ggttccaaataggggtggAAAAAGCTCAGTCCATCCTCGTAAATCCTCATCAATCATC   |
| Tfap2B B2 20 | cagtcaggtagtttggaggAAAAAGCTCAGTCCATCCTCGTAAATCCTCATCAATCATC  |
| Tfap2B B2 21 | atcttgccatgcctttgagAAAAAGCTCAGTCCATCCTCGTAAATCCTCATCAATCATC  |
| Tfap2B B2 22 | tgttagcagtggtgtgtcAAAAAGCTCAGTCCATCCTCGTAAATCCTCATCAATCATC   |
| Tfap2B B2 23 | agttttactacctggtccttAAAAAGCTCAGTCCATCCTCGTAAATCCTCATCAATCATC |
| Tfap2B B2 24 | attttctgtgttctctccAAAAAGCTCAGTCCATCCTCGTAAATCCTCATCAATCATC   |
| Sox8 B3 1    | cctcggtcatgttgagcatTAAAAAGTCTAATCCGTCCTGCCTCTATATCTCCACTC    |
| Sox8 B3 2    | cacgtgggacatggagctgTAAAAAGTCTAATCCGTCCTGCCTCTATATCTCCACTC    |
| Sox8 B3 3    | cttcagcacctgcgagacgTAAAAAGTCTAATCCGTCCTGCCTCTATATCTCCACTC    |
| Sox8 B3 4    | tgtgcagggtcggtattgTAAAAAGTCTAATCCGTCCTGCCTCTATATCTCCACTC     |
| Sox8 B3 5    | agctttcacgcttttctcTAAAAAGTCTAATCCGTCCTGCCTCTATATCTCCACTC     |
| Sox8 B3 6    | catgatggctgagctcggcTAAAAAGTCTAATCCGTCCTGCCTCTATATCTCCACTC    |
| Sox8 B3 7    | tgtcagcctttagatctgTAAAAAGTCTAATCCGTCCTGCCTCTATATCTCCACTC     |
| Sox8 B3 8    | aagtcattgttgcggcTAAAAAGTCTAATCCGTCCTGCCTCTATATCTCCACTC       |
| Sox8 B3 9    | ctggtcaaactcgtgcacaTAAAAAGTCTAATCCGTCCTGCCTCTATATCTCCACTC    |
| Sox8 B3 10   | atggcagtatggccattgaTAAAAAGTCTAATCCGTCCTGCCTCTATATCTCCACTC    |
| Sox8 B3 11   | gagtaggacgtgctgtagaTAAAAAGTCTAATCCGTCCTGCCTCTATATCTCCACTC    |
| Sox8 B3 12   | tcttgtgagtcacacctgTAAAAAGTCTAATCCGTCCTGCCTCTATATCTCCACTC     |
| Sox8 B3 13   | aatcagccgatgacggcgaTAAAAAGTCTAATCCGTCCTGCCTCTATATCTCCACTC    |
| Sox8 B3 14   | ttttgatgtgcggccttgTAAAAAGTCTAATCCGTCCTGCCTCTATATCTCCACTC     |
| Sox8 B3 15   | gggactggtcgtgtagtgTAAAAAGTCTAATCCGTCCTGCCTCTATATCTCCACTC     |
| Sox8 B3 16   | gtaggagccgtagtcagagTAAAAAGTCTAATCCGTCCTGCCTCTATATCTCCACTC    |
| Sox8 B3 17   | gggggttagtagtgtagTAAAAAGTCTAATCCGTCCTGCCTCTATATCTCCACTC      |
| Sox8 B3 18   | gtagatgctggaggggtaaTAAAAAGTCTAATCCGTCCTGCCTCTATATCTCCACTC    |
| Sox8 B3 19   | ccgtgaggagtggaagtagTAAAAAGTCTAATCCGTCCTGCCTCTATATCTCCACTC    |
| Sox8 B3 20   | gacaagccgttgaggatggTAAAAAGTCTAATCCGTCCTGCCTCTATATCTCCACTC    |
| Sox8 B3 21   | tcgtcagggttgtagacTAAAAAGTCTAATCCGTCCTGCCTCTATATCTCCACTC      |
| E2f1 B4 1    | cgagacgatgaggaggtgcATTTACATTTACAGACCTCAACCTACCTCCAACCTCTCAC  |
| E2f1 B4 2    | tggcgaagagcaggaggtcATTTACATTTACAGACCTCAACCTACCTCCAACCTCTCAC  |
| E2f1 B4 3    | aagttcagcttccgcttcaATTTACATTTACAGACCTCAACCTACCTCCAACCTCTCAC  |
| E2f1 B4 4    | cggctatgtactggtgatcATTTACATTTACAGACCTCAACCTACCTCCAACCTCTCAC  |
| E2f1 B4 5    | tttcatacggggacttctcATTTACATTTACAGACCTCAACCTACCTCCAACCTCTCAC  |
| E2f1 B4 6    | gcttggtggtgaggttcagATTTACATTTACAGACCTCAACCTACCTCCAACCTCTCAC  |
| E2f1 B4 7    | cagttgaggtccaccacacATTTACATTTACAGACCTCAACCTACCTCCAACCTCTCAC  |
| E2f1 B4 8    | aggacattggtgatgtcgtATTTACATTTACAGACCTCAACCTACCTCCAACCTCTCAC  |
| E2f1 B4 9    | ttggtagtgagctggatgcATTTACATTTACAGACCTCAACCTACCTCCAACCTCTCAC  |
| E2f1 B4 10   | ccactggatgtgttcttgATTTACATTTACAGACCTCAACCTACCTCCAACCTCTCAC   |
| E2f1 B4 11   | tggagggatcctcagtgagATTTACATTTACAGACCTCAACCTACCTCCAACCTCTCAC  |
| E2f1 B4 12   | gtgccttgataaccatcacATTTACATTTACAGACCTCAACCTACCTCCAACCTCTCAC  |
| E2f1 B4 13   | agacttgacagctgggtctcATTTACATTTACAGACCTCAACCTACCTCCAACCTCTCAC |
| E2f1 B4 14   | gggacagaggaacacgtcgATTTACATTTACAGACCTCAACCTACCTCCAACCTCTCAC  |
| E2f1 B4 15   | cttgaaggggctcttgacgATTTACATTTACAGACCTCAACCTACCTCCAACCTCTCAC  |
| E2f1 B4 16   | gtgtgtccatggaggtagATTTACATTTACAGACCTCAACCTACCTCCAACCTCTCAC   |
| E2f1 B4 17   | gaaatcgtccttgccatgcATTTACATTTACAGACCTCAACCTACCTCCAACCTCTCAC  |
| E2f1 B4 18   | gaactcatccgccaggaagATTTACATTTACAGACCTCAACCTACCTCCAACCTCTCAC  |
| E2f1 B4 19   | aaagagctcactgatgcccATTTACATTTACAGACCTCAACCTACCTCCAACCTCTCAC  |
| Ccnd1 B5 1   | tgtcattgagcaggttggcgATTTCACTTCATATCACTCACTCCCAATCTCTATCTACCC |
| Ccnd1 B5 2   | cacttgaagtaggacaccgaATTTCACTTCATATCACTCACTCCCAATCTCTATCTACCC |
| Ccnd1 B5 3   | atccaagtggcgactattttATTTCACTTCATATCACTCACTCCCAATCTCTATCTACCC |
| Ccnd1 B5 4   | aaaacttcctctcgcacttATTTCACTTCATATCACTCACTCCCAATCTCTATCTACCC  |
| Ccnd1 B5 5   | gtccaaataattcatcgccaATTTCACTTCATATCACTCACTCCCAATCTCTATCTACCC |
| Ccnd1 B5 6   | tttctgaggggttcgaacgATTTCACTTCATATCACTCACTCCCAATCTCTATCTACCC  |
| Ccnd1 B5 7   | tagctccgagcaattgcaacATTTCACTTCATATCACTCACTCCCAATCTCTATCTACCC |

|             |                                                              |
|-------------|--------------------------------------------------------------|
| Ccnd1 B5 8  | tttctgcggtcagaggaatATTTCACTTCATATCACTCACTCCCAATCTCTATCTACCC  |
| Ccnd1 B5 9  | ggagtgtcgggtgaaatgcATTTCACTTCATATCACTCACTCCCAATCTCTATCTACCC  |
| Ccnd1 B5 10 | catttgcaactcgtcggaATTTCACTTCATATCACTCACTCCCAATCTCTATCTACCC   |
| Ccnd1 B5 11 | aatgaaatcgtggggggtcaATTTCACTTCATATCACTCACTCCCAATCTCTATCTACCC |
| Ccnd1 B5 12 | agaggcatttagtgaggaaATTTCACTTCATATCACTCACTCCCAATCTCTATCTACCC  |
| Ccnd1 B5 13 | gatgatctgttggtgtcctATTTCACTTCATATCACTCACTCCCAATCTCTATCTACCC  |
| Ccnd1 B5 14 | aatttaacatctgtagcgcaATTTCACTTCATATCACTCACTCCCAATCTCTATCTACCC |
| Ccnd1 B5 15 | gatcatggaaggtgggttgATTTCACTTCATATCACTCACTCCCAATCTCTATCTACCC  |
| Ccnd1 B5 16 | aggaaagtgttagtgtcccATTTCACTTCATATCACTCACTCCCAATCTCTATCTACCC  |
| Ccnd1 B5 17 | acaatccgcatcacatttgaATTTCACTTCATATCACTCACTCCCAATCTCTATCTACCC |
| Ccnd1 B5 18 | ttcaatctgttcttggcaggATTTCACTTCATATCACTCACTCCCAATCTCTATCTACCC |
| Ccnd1 B5 19 | tggcgtagactggattcaagATTTCACTTCATATCACTCACTCCCAATCTCTATCTACCC |
| Ccnd1 B5 20 | caggaaaggtctgcttcgtcATTTCACTTCATATCACTCACTCCCAATCTCTATCTACCC |
| Ccnd1 B5 21 | aatgttcacatctcgacacATTTCACTTCATATCACTCACTCCCAATCTCTATCTACCC  |

## Hyb 6

|             |                                                              |
|-------------|--------------------------------------------------------------|
| Runx2 B1 1  | ttgctgacatgggtgcacggTATAGCATTCTTTCTTGAGGAGGGCAGCAAACGGGAAGAG |
| Runx2 B1 2  | tgggtcgtgggatccaaaagTATAGCATTCTTTCTTGAGGAGGGCAGCAAACGGGAAGAG |
| Runx2 B1 3  | cgatgatctccaccatgggtTATAGCATTCTTTCTTGAGGAGGGCAGCAAACGGGAAGAG |
| Runx2 B1 4  | cttcatcacagcagaagcatTATAGCATTCTTTCTTGAGGAGGGCAGCAAACGGGAAGAG |
| Runx2 B1 5  | cacgaatcgcaggctattgaTATAGCATTCTTTCTTGAGGAGGGCAGCAAACGGGAAGAG |
| Runx2 B1 6  | gggattgtcaggacagttaTATAGCATTCTTTCTTGAGGAGGGCAGCAAACGGGAAGAG  |
| Runx2 B1 7  | agagtcatcaagcttctgtcTATAGCATTCTTTCTTGAGGAGGGCAGCAAACGGGAAGAG |
| Runx2 B1 8  | aggcgttcagggaacaaactTATAGCATTCTTTCTTGAGGAGGGCAGCAAACGGGAAGAG |
| Runx2 B1 9  | ttggtgcagagttcagagagTATAGCATTCTTTCTTGAGGAGGGCAGCAAACGGGAAGAG |
| Runx2 B1 10 | actctgtccttggattaaTATAGCATTCTTTCTTGAGGAGGGCAGCAAACGGGAAGAG   |
| Runx2 B1 11 | cgactgatcataggaccacgTATAGCATTCTTTCTTGAGGAGGGCAGCAAACGGGAAGAG |
| Runx2 B1 12 | tcatctggctcaagtaggacTATAGCATTCTTTCTTGAGGAGGGCAGCAAACGGGAAGAG |
| Runx2 B1 13 | gagtcgtggagtgaatggacTATAGCATTCTTTCTTGAGGAGGGCAGCAAACGGGAAGAG |
| Runx2 B1 14 | gaactgcctgggatctgaaaTATAGCATTCTTTCTTGAGGAGGGCAGCAAACGGGAAGAG |
| Runx2 B1 15 | gatagtgcattcgtgggttgTATAGCATTCTTTCTTGAGGAGGGCAGCAAACGGGAAGAG |
| Runx2 B1 16 | cgggcggtgataggtaaaTATAGCATTCTTTCTTGAGGAGGGCAGCAAACGGGAAGAG   |
| Runx2 B1 17 | cggacataccagtgacatgTATAGCATTCTTTCTTGAGGAGGGCAGCAAACGGGAAGAG  |
| Runx2 B1 18 | caggtaggtgtgttagtgagTATAGCATTCTTTCTTGAGGAGGGCAGCAAACGGGAAGAG |
| Runx2 B1 19 | actttggtttggaggagcTATAGCATTCTTTCTTGAGGAGGGCAGCAAACGGGAAGAG   |
| Runx2 B1 20 | gacgaagtgccatagtagagTATAGCATTCTTTCTTGAGGAGGGCAGCAAACGGGAAGAG |
| Runx2 B1 21 | caccatggggaactggtacgTATAGCATTCTTTCTTGAGGAGGGCAGCAAACGGGAAGAG |
| Runx2 B1 22 | cggaggaagcatcctggaagTATAGCATTCTTTCTTGAGGAGGGCAGCAAACGGGAAGAG |
| Runx2 B1 23 | caaaacagttggggagctgcTATAGCATTCTTTCTTGAGGAGGGCAGCAAACGGGAAGAG |
| Mitf B2 1   | tagcaggattcgtgaggtcaAAAAAGCTCAGTCCATCCTCGTAAATCCTCATCAATCATC |
| Mitf B2 2   | tgcattcgtcacgcatgagAAAAAGCTCAGTCCATCCTCGTAAATCCTCATCAATCATC  |
| Mitf B2 3   | tgacgttgatggcaggtgtcAAAAAGCTCAGTCCATCCTCGTAAATCCTCATCAATCATC |
| Mitf B2 4   | gttgattctcaaggtgagtAAAAAGCTCAGTCCATCCTCGTAAATCCTCATCAATCATC  |
| Mitf B2 5   | ttggcgtgtttattgtcagAAAAAGCTCAGTCCATCCTCGTAAATCCTCATCAATCATC  |
| Mitf B2 6   | tcaagccaaggtttctcaAAAAAGCTCAGTCCATCCTCGTAAATCCTCATCAATCATC   |
| Mitf B2 7   | tatttgcatttgaaggctAAAAAGCTCAGTCCATCCTCGTAAATCCTCATCAATCATC   |
| Mitf B2 8   | atcaaatccagacactggAAAAAGCTCAGTCCATCCTCGTAAATCCTCATCAATCATC   |
| Mitf B2 9   | catgcttgggtgccataaaAAAAAGCTCAGTCCATCCTCGTAAATCCTCATCAATCATC  |
| Mitf B2 10  | tgtgatgttaagtcttgaAAAAAGCTCAGTCCATCCTCGTAAATCCTCATCAATCATC   |
| Mitf B2 11  | ttaggaagattagctggacaAAAAAGCTCAGTCCATCCTCGTAAATCCTCATCAATCATC |
| Mitf B2 12  | ctcgttctgactctgtgagAAAAAGCTCAGTCCATCCTCGTAAATCCTCATCAATCATC  |
| Mitf B2 13  | gttctttatacggcattaAAAAAGCTCAGTCCATCCTCGTAAATCCTCATCAATCATC   |
| Mitf B2 14  | cttattccagcgcatatccgAAAAAGCTCAGTCCATCCTCGTAAATCCTCATCAATCATC |
| Mitf B2 15  | tgttcaagttcctctgtAAAAAGCTCAGTCCATCCTCGTAAATCCTCATCAATCATC    |
| Mitf B2 16  | ttggcgtgttccaatttctAAAAAGCTCAGTCCATCCTCGTAAATCCTCATCAATCATC  |
| Mitf B2 17  | ctcaagttcctgtattctgaAAAAAGCTCAGTCCATCCTCGTAAATCCTCATCAATCATC |
| Mitf B2 18  | accatatcaggggagcaaatAAAAAGCTCAGTCCATCCTCGTAAATCCTCATCAATCATC |
| Mitf B2 19  | gcacaggttctgtttgatgAAAAAGCTCAGTCCATCCTCGTAAATCCTCATCAATCATC  |
| Mitf B2 20  | ttccgaggttgactgaagAAAAAGCTCAGTCCATCCTCGTAAATCCTCATCAATCATC   |

|              |                                                               |
|--------------|---------------------------------------------------------------|
| Mitf B2 21   | acactgtaagtgcagttggAAAAAGCTCAGTCCATCCTCGTAAATCCTCATCAATCATC   |
| Mitf B2 22   | cagtttgatcccattttgAAAAAGCTCAGTCCATCCTCGTAAATCCTCATCAATCATC    |
| Mitf B2 23   | agggtatcgatccatcaagatAAAAAGCTCAGTCCATCCTCGTAAATCCTCATCAATCATC |
| Mitf B2 24   | aacaagcatgatcagtgctcAAAAAGCTCAGTCCATCCTCGTAAATCCTCATCAATCATC  |
| Plp1 B3 1    | tatgagacagcgggcacagTAAAAAAGTCTAATCCGTCCCTGCCTCTATATCTCCACTC   |
| Plp1 B3 2    | cgaccagagaggcgaaggTAAAAAAGTCTAATCCGTCCCTGCCTCTATATCTCCACTC    |
| Plp1 B3 3    | cgaccccaaagaagcagagTAAAAAAGTCTAATCCGTCCCTGCCTCTATATCTCCACTC   |
| Plp1 B3 4    | taggtctcaatgagctgctTAAAAAAGTCTAATCCGTCCCTGCCTCTATATCTCCACTC   |
| Plp1 B3 5    | gctgttccatagatgacgtTAAAAAAGTCTAATCCGTCCCTGCCTCTATATCTCCACTC   |
| Plp1 B3 6    | tgtagaagccttcggccagTAAAAAAGTCTAATCCGTCCCTGCCTCTATATCTCCACTC   |
| Plp1 B3 7    | aagatttgccgactgcgcTAAAAAAGTCTAATCCGTCCCTGCCTCTATATCTCCACTC    |
| Plp1 B3 8    | cagatgggtgccgtagtTAAAAAAGTCTAATCCGTCCCTGCCTCTATATCTCCACTC     |
| Plp1 B3 9    | cagttaccgttgcgtagTAAAAAAGTCTAATCCGTCCCTGCCTCTATATCTCCACTC     |
| Plp1 B3 10   | aaagagtgaactcgctggTAAAAAAGTCTAATCCGTCCCTGCCTCTATATCTCCACTC    |
| Plp1 B3 11   | tccaaacactgacacaccTAAAAAAGTCTAATCCGTCCCTGCCTCTATATCTCCACTC    |
| Plp1 B3 12   | actgtcaggatgtcctagTAAAAAAGTCTAATCCGTCCCTGCCTCTATATCTCCACTC    |
| Plp1 B3 13   | cgatggtcaggacataggtTAAAAAAGTCTAATCCGTCCCTGCCTCTATATCTCCACTC   |
| Plp1 B3 14   | gaaggcgatggactggcagTAAAAAAGTCTAATCCGTCCCTGCCTCTATATCTCCACTC   |
| Plp1 B3 15   | gatgctggcagtggtcttgTAAAAAAGTCTAATCCGTCCCTGCCTCTATATCTCCACTC   |
| Plp1 B3 16   | caggacaccgtacatcctgTAAAAAAGTCTAATCCGTCCCTGCCTCTATATCTCCACTC   |
| Plp1 B3 17   | acacacctcccggaacTAAAAAAGTCTAATCCGTCCCTGCCTCTATATCTCCACTC      |
| Plp1 B3 18   | agtcatttgaactcgctgTAAAAAAGTCTAATCCGTCCCTGCCTCTATATCTCCACTC    |
| Plp1 B3 19   | cagtgaagaccagagtggcgTAAAAAAGTCTAATCCGTCCCTGCCTCTATATCTCCACTC  |
| Plp1 B3 20   | agtggcggcgatcatgaagTAAAAAAGTCTAATCCGTCCCTGCCTCTATATCTCCACTC   |
| Col2A1 B4 1  | catctttaatatctccgggATTTCACATTTACAGACCTCAACCTACCTCCAACCTCTCAC  |
| Col2A1 B4 2  | ttgaaatccctggggaccagATTTCACATTTACAGACCTCAACCTACCTCCAACCTCTCAC |
| Col2A1 B4 3  | gtgaaccagattcaccttgATTTCACATTTACAGACCTCAACCTACCTCCAACCTCTCAC  |
| Col2A1 B4 4  | tgggagaccacataaccacATTTCACATTTACAGACCTCAACCTACCTCCAACCTCTCAC  |
| Col2A1 B4 5  | tttccagtgggaccaacagATTTCACATTTACAGACCTCAACCTACCTCCAACCTCTCAC  |
| Col2A1 B4 6  | tagagccatcttggccagagATTTCACATTTACAGACCTCAACCTACCTCCAACCTCTCAC |
| Col2A1 B4 7  | cagtccagcaaaagcagacaATTTCACATTTACAGACCTCAACCTACCTCCAACCTCTCAC |
| Col2A1 B4 8  | gatttgagggtggcatccacATTTCACATTTACAGACCTCAACCTACCTCCAACCTCTCAC |
| Col2A1 B4 9  | cggatgctctcaatctgattATTTCACATTTACAGACCTCAACCTACCTCCAACCTCTCAC |
| Col2A1 B4 10 | gatggcagagttgatgtcgATTTCACATTTACAGACCTCAACCTACCTCCAACCTCTCAC  |
| Col2A1 B4 11 | ttcgggtcaatccagtaatcATTTCACATTTACAGACCTCAACCTACCTCCAACCTCTCAC |
| Col2A1 B4 12 | atactttgatggcgccaagATTTCACATTTACAGACCTCAACCTACCTCCAACCTCTCAC  |
| Col2A1 B4 13 | ggtctctgcaaaccagacgtATTTCACATTTACAGACCTCAACCTACCTCCAACCTCTCAC |
| Col2A1 B4 14 | agctgaagtggaaaccgcccATTTCACATTTACAGACCTCAACCTACCTCCAACCTCTCAC |
| Col2A1 B4 15 | atgaggatggctttctcagATTTCACATTTACAGACCTCAACCTACCTCCAACCTCTCAC  |
| Col2A1 B4 16 | tgatctccacgtcgttgatATTTCACATTTACAGACCTCAACCTACCTCCAACCTCTCAC  |
| Col2A1 B4 17 | caagacgctgtaggtgaaccATTTCACATTTACAGACCTCAACCTACCTCCAACCTCTCAC |
| Col2A1 B4 18 | attgccagtggtttcgtgATTTCACATTTACAGACCTCAACCTACCTCCAACCTCTCAC   |
| Col2A1 B4 19 | tgaaccgggtactcgatcacATTTCACATTTACAGACCTCAACCTACCTCCAACCTCTCAC |
| Col2A1 B4 20 | aatgtccataggtgcagtatATTTCACATTTACAGACCTCAACCTACCTCCAACCTCTCAC |
| HuD B5 1     | ctccatggtgctaattatcaATTTCACATTCATATCACTCACTCCCAATCTCTATCTACCC |
| HuD B5 2     | gtccattggtgtattggaaATTTCACATTCATATCACTCACTCCCAATCTCTATCTACCC  |
| HuD B5 3     | aagggcagtttctactgttgATTTCACATTCATATCACTCACTCCCAATCTCTATCTACCC |
| HuD B5 4     | catgttctggggtaaatagtATTTCACATTCATATCACTCACTCCCAATCTCTATCTACCC |
| HuD B5 5     | gattttgtctctcacgagctATTTCACATTCATATCACTCACTCCCAATCTCTATCTACCC |
| HuD B5 6     | atccatatcctaactctgcATTTCACATTCATATCACTCACTCCCAATCTCTATCTACCC  |
| HuD B5 7     | gcaccttttgatcaatgtaATTTCACATTCATATCACTCACTCCCAATCTCTATCTACCC  |
| HuD B5 8     | tctgagtccattaaagtgtATTTCACATTCATATCACTCACTCCCAATCTCTATCTACCC  |
| HuD B5 9     | gatacctttatggttttggtATTTCACATTCATATCACTCACTCCCAATCTCTATCTACCC |
| HuD B5 10    | ttgatgctgaactggacggATTTCACATTCATATCACTCACTCCCAATCTCTATCTACCC  |
| HuD B5 11    | cgcccatattgtgagaataaATTTCACATTCATATCACTCACTCCCAATCTCTATCTACCC |
| HuD B5 12    | ctgatcaaccagaatccgtATTTCACATTCATATCACTCACTCCCAATCTCTATCTACCC  |
| HuD B5 13    | taaatcccacacctcgagaaATTTCACATTCATATCACTCACTCCCAATCTCTATCTACCC |
| HuD B5 14    | gcctctattctctatcaaaATTTCACATTCATATCACTCACTCCCAATCTCTATCTACCC  |
| HuD B5 15    | aggatagcgtctgttgggagATTTCACATTCATATCACTCACTCCCAATCTCTATCTACCC |

|           |                                                              |
|-----------|--------------------------------------------------------------|
| HuD B5 16 | ggccatattaagcaaattgtATTTCACTTCATATCACTCACTCCCAATCTCTATCTACCC |
| HuD B5 17 | ttggggagaacctttaacgATTTCACTTCATATCACTCACTCCCAATCTCTATCTACCC  |
| HuD B5 18 | tgtgaccagggatattcattATTTCACTTCATATCACTCACTCCCAATCTCTATCTACCC |
| HuD B5 19 | acagcacactctcatctgagATTTCACTTCATATCACTCACTCCCAATCTCTATCTACCC |
| HuD B5 20 | attattgaccgctcccgaagATTTCACTTCATATCACTCACTCCCAATCTCTATCTACCC |
| HuD B5 21 | aaagccaaatccctgcactATTTCACTTCATATCACTCACTCCCAATCTCTATCTACCC  |
| HuD B5 22 | atccattaaggctggcaatcATTTCACTTCATATCACTCACTCCCAATCTCTATCTACCC |
| HuD B5 23 | tgcaatactctgtctcctaaATTTCACTTCATATCACTCACTCCCAATCTCTATCTACCC |
| HuD B5 24 | ggatttgtgggttttattggATTTCACTTCATATCACTCACTCCCAATCTCTATCTACCC |

## Hyb 7

|              |                                                              |
|--------------|--------------------------------------------------------------|
| Krt14 B1 1   | gaactgccggacagtgggtTATAGCATTCTTTCTTGAGGAGGGCAGCAAACGGGAAGAG  |
| Krt14 B1 2   | cttgagggagggtgaggagTATAGCATTCTTTCTTGAGGAGGGCAGCAAACGGGAAGAG  |
| Krt14 B1 3   | agacgatgcgggaggagacTATAGCATTCTTTCTTGAGGAGGGCAGCAAACGGGAAGAG  |
| Krt14 B1 4   | cattgtttcctctcgcgcTATAGCATTCTTTCTTGAGGAGGGCAGCAAACGGGAAGAG   |
| Krt14 B1 5   | tgatctcacctccagatcTATAGCATTCTTTCTTGAGGAGGGCAGCAAACGGGAAGAG   |
| Krt14 B1 6   | aagaatcttctcgcgcTATAGCATTCTTTCTTGAGGAGGGCAGCAAACGGGAAGAG     |
| Krt14 B1 7   | ggcattctcaacagttgcgTATAGCATTCTTTCTTGAGGAGGGCAGCAAACGGGAAGAG  |
| Krt14 B1 8   | ctgctccgtctcaacttgTATAGCATTCTTTCTTGAGGAGGGCAGCAAACGGGAAGAG   |
| Krt14 B1 9   | tctcaatctgcatctccagTATAGCATTCTTTCTTGAGGAGGGCAGCAAACGGGAAGAG  |
| Krt14 B1 10  | tgaggtcaatgccgggagcTATAGCATTCTTTCTTGAGGAGGGCAGCAAACGGGAAGAG  |
| Krt14 B1 11  | gcatctcagccaggatcttTATAGCATTCTTTCTTGAGGAGGGCAGCAAACGGGAAGAG  |
| Krt14 B1 12  | gaagaaccactgctcagcaTATAGCATTCTTTCTTGAGGAGGGCAGCAAACGGGAAGAG  |
| Krt14 B1 13  | gatctccaggctctggatgTATAGCATTCTTTCTTGAGGAGGGCAGCAAACGGGAAGAG  |
| Krt14 B1 14  | catgtcacagcgcagctcgTATAGCATTCTTTCTTGAGGAGGGCAGCAAACGGGAAGAG  |
| Krt14 B1 15  | actgggaagagatgtgggcTATAGCATTCTTTCTTGAGGAGGGCAGCAAACGGGAAGAG  |
| Krt14 B1 16  | gaggtcgtaatggcgtctcTATAGCATTCTTTCTTGAGGAGGGCAGCAAACGGGAAGAG  |
| Nestin B2 1  | ctctggatctcagctcgaagAAAAAGCTCAGTCCATCCTCGTAAATCCTCATCAATCATC |
| Nestin B2 2  | tctctgacagtctttggagAAAAAGCTCAGTCCATCCTCGTAAATCCTCATCAATCATC  |
| Nestin B2 3  | gacatcttgagggtcatgagAAAAAGCTCAGTCCATCCTCGTAAATCCTCATCAATCATC |
| Nestin B2 4  | cgagctgattttctggaactAAAAAGCTCAGTCCATCCTCGTAAATCCTCATCAATCATC |
| Nestin B2 5  | atctgcatctccttgagagAAAAAGCTCAGTCCATCCTCGTAAATCCTCATCAATCATC  |
| Nestin B2 6  | tgagtggggcacttcttgAAAAAGCTCAGTCCATCCTCGTAAATCCTCATCAATCATC   |
| Nestin B2 7  | tctgggtggcacttaacaatAAAAAGCTCAGTCCATCCTCGTAAATCCTCATCAATCATC |
| Nestin B2 8  | agcacaagcagcttcgattAAAAAGCTCAGTCCATCCTCGTAAATCCTCATCAATCATC  |
| Nestin B2 9  | ggattcctgttgcaaaactAAAAAGCTCAGTCCATCCTCGTAAATCCTCATCAATCATC  |
| Nestin B2 10 | cttcaatgctagaagccttcAAAAAGCTCAGTCCATCCTCGTAAATCCTCATCAATCATC |
| Nestin B2 11 | tcctgaaggtctctatgttcAAAAAGCTCAGTCCATCCTCGTAAATCCTCATCAATCATC |
| Nestin B2 12 | cttgctgttttgactgatgAAAAAGCTCAGTCCATCCTCGTAAATCCTCATCAATCATC  |
| Nestin B2 13 | tctgcatgtgggtgtcatcAAAAAGCTCAGTCCATCCTCGTAAATCCTCATCAATCATC  |
| Nestin B2 14 | tcaatgggtctgagctgagAAAAAGCTCAGTCCATCCTCGTAAATCCTCATCAATCATC  |
| Nestin B2 15 | agcatcctctgactgaaagtAAAAAGCTCAGTCCATCCTCGTAAATCCTCATCAATCATC |
| Nestin B2 16 | tgtatgcacatagcggcgtgAAAAAGCTCAGTCCATCCTCGTAAATCCTCATCAATCATC |
| Nestin B2 17 | actataaagtagccttctcAAAAAGCTCAGTCCATCCTCGTAAATCCTCATCAATCATC  |
| Nestin B2 18 | ctgttagttcatccttctgAAAAAGCTCAGTCCATCCTCGTAAATCCTCATCAATCATC  |
| Nestin B2 19 | caccaaagatgctactccagAAAAAGCTCAGTCCATCCTCGTAAATCCTCATCAATCATC |
| Nestin B2 20 | tccttggcatctcaaatcAAAAAGCTCAGTCCATCCTCGTAAATCCTCATCAATCATC   |
| Nestin B2 21 | aggggtggtctatcagtgtgAAAAAGCTCAGTCCATCCTCGTAAATCCTCATCAATCATC |
| Nestin B2 22 | cagtgttgagggatcagtgAAAAAGCTCAGTCCATCCTCGTAAATCCTCATCAATCATC  |
| Nestin B2 23 | acatcggggagatattcagcAAAAAGCTCAGTCCATCCTCGTAAATCCTCATCAATCATC |
| Nestin B2 24 | tatctccagaatatccgagtAAAAAGCTCAGTCCATCCTCGTAAATCCTCATCAATCATC |
| FabP7 B3 1   | cttcacgtcgcgcagaaagTAAAAAAGTCTAATCCGTCCTGCCTCTATATCTCCACTC   |
| FabP7 B3 2   | gccttcatgtattcgtcaaaTAAAAAAGTCTAATCCGTCCTGCCTCTATATCTCCACTC  |
| FabP7 B3 3   | gatgatcactgtgggcttagTAAAAAAGTCTAATCCGTCCTGCCTCTATATCTCCACTC  |
| FabP7 B3 4   | agtctgatcacgactttgtTAAAAAAGTCTAATCCGTCCTGCCTCTATATCTCCACTC   |
| FabP7 B3 5   | tcgccgagtttaagctgatTAAAAAAGTCTAATCCGTCCTGCCTCTATATCTCCACTC   |
| FabP7 B3 6   | gggggtggttcatcaaatTAAAAAAGTCTAATCCGTCCTGCCTCTATATCTCCACTC    |
| FabP7 B3 7   | cacaactgatttgcagtccTAAAAAAGTCTAATCCGTCCTGCCTCTATATCTCCACTC   |
| FabP7 B3 8   | cccatttctgacatgaactTAAAAAAGTCTAATCCGTCCTGCCTCTATATCTCCACTC   |



|             |                                                               |
|-------------|---------------------------------------------------------------|
| FabP7 B3 9  | acaaagttgtctctttgccTAAAAAAGTCTAATCCGTCCCTGCCTCTATATCTCCACTC   |
| FabP7 B3 10 | attctgccatcctttatttcTAAAAAAGTCTAATCCGTCCCTGCCTCTATATCTCCACTC  |
| FabP7 B3 11 | caccacatcaccaaaggttaaTAAAAAAGTCTAATCCGTCCCTGCCTCTATATCTCCACTC |
| FabP7 B3 12 | ctttctcatagtggcgaacaTAAAAAAGTCTAATCCGTCCCTGCCTCTATATCTCCACTC  |
| Krt19 B4 1  | ctgaagctataagtcgccatATTTACATTTACAGACCTCAACCTACCTCCAACCTCTCAC  |
| Krt19 B4 2  | tggcgggaagagactgacactATTTACATTTACAGACCTCAACCTACCTCCAACCTCTCAC |
| Krt19 B4 3  | cctagggcagaagagacaaaATTTACATTTACAGACCTCAACCTACCTCCAACCTCTCAC  |
| Krt19 B4 4  | agaggagaccgtcaccagagATTTACATTTACAGACCTCAACCTACCTCCAACCTCTCAC  |
| Krt19 B4 5  | atcgtgtgtctttcattcccATTTACATTTACAGACCTCAACCTACCTCCAACCTCTCAC  |
| Krt19 B4 6  | tctgagttgtcttcttccaaATTTACATTTACAGACCTCAACCTACCTCCAACCTCTCAC  |
| Krt19 B4 7  | ctcccgagtttagttcaaATTTACATTTACAGACCTCAACCTACCTCCAACCTCTCAC    |
| Krt19 B4 8  | aataagggctgtagctcggATTTACATTTACAGACCTCAACCTACCTCCAACCTCTCAC   |
| Krt19 B4 9  | cggaggtcttcaatagccttATTTACATTTACAGACCTCAACCTACCTCCAACCTCTCAC  |
| Krt19 B4 10 | tagtggcagcaaggatctggATTTACATTTACAGACCTCAACCTACCTCCAACCTCTCAC  |
| Krt19 B4 11 | cttggtcttgaagtcgtcagATTTACATTTACAGACCTCAACCTACCTCCAACCTCTCAC  |
| Krt19 B4 12 | gaagagctgtctctgtttcaATTTACATTTACAGACCTCAACCTACCTCCAACCTCTCAC  |
| Krt19 B4 13 | atactggtctctcatatcggATTTACATTTACAGACCTCAACCTACCTCCAACCTCTCAC  |
| Krt19 B4 14 | cagtcttactgtggaaccagATTTACATTTACAGACCTCAACCTACCTCCAACCTCTCAC  |
| Krt19 B4 15 | tgtagctgttcggtattgacATTTACATTTACAGACCTCAACCTACCTCCAACCTCTCAC  |
| Krt19 B4 16 | cagtgaactcagactgtctgATTTACATTTACAGACCTCAACCTACCTCCAACCTCTCAC  |
| Krt19 B4 17 | ttcatgtgagctgggactgATTTACATTTACAGACCTCAACCTACCTCCAACCTCTCAC   |
| Krt19 B4 18 | tcaatgctgccaatcatgtcATTTACATTTACAGACCTCAACCTACCTCCAACCTCTCAC  |
| Krt19 B4 19 | atcttgattcgctgttctgATTTACATTTACAGACCTCAACCTACCTCCAACCTCTCAC   |
| Krt19 B4 20 | acgggtcttgatatccatgaATTTACATTTACAGACCTCAACCTACCTCCAACCTCTCAC  |
| Krt19 B4 21 | taagtagcgatctcctgctcATTTACATTTACAGACCTCAACCTACCTCCAACCTCTCAC  |
| Krt19 B4 22 | ttttgcgggagatccagaaATTTACATTTACAGACCTCAACCTACCTCCAACCTCTCAC   |
| Alx1 B5 1   | tgctcccatgtaaaagtcacATTTCACTTCATATCACTCACTCCCAATCTCTATCTACCC  |
| Alx1 B5 2   | ggactcattgtccaaagtttATTTCACTTCATATCACTCACTCCCAATCTCTATCTACCC  |
| Alx1 B5 3   | tgctgtgacgttttgctataaATTTCACTTCATATCACTCACTCCCAATCTCTATCTACCC |
| Alx1 B5 4   | ttgaaggcctgcacacatttATTTCACTTCATATCACTCACTCCCAATCTCTATCTACCC  |
| Alx1 B5 5   | catagttcacgttgtgtctATTTCACTTCATATCACTCACTCCCAATCTCTATCTACCC   |
| Alx1 B5 6   | ccagctgcaaaactggtgaaaATTTCACTTCATATCACTCACTCCCAATCTCTATCTACCC |
| Alx1 B5 7   | ctcacgtagacatcagggttaATTTCACTTCATATCACTCACTCCCAATCTCTATCTACCC |
| Alx1 B5 8   | ctcttagctgtggtatctgATTTCACTTCATATCACTCACTCCCAATCTCTATCTACCC   |
| Alx1 B5 9   | atataatcataagtggcagcaATTTCACTTCATATCACTCACTCCCAATCTCTATCTACCC |
| Alx1 B5 10  | ctgtcagtccttggaagaacATTTCACTTCATATCACTCACTCCCAATCTCTATCTACCC  |
| Alx1 B5 11  | acagaaccactagcgggtgttATTTCACTTCATATCACTCACTCCCAATCTCTATCTACCC |
| Alx1 B5 12  | gtggtatcatgcaggaagtaATTTCACTTCATATCACTCACTCCCAATCTCTATCTACCC  |
| Alx1 B5 13  | ccggggtgaatgggaataagATTTCACTTCATATCACTCACTCCCAATCTCTATCTACCC  |
| Alx1 B5 14  | aagcctgtgtagccagaatcATTTCACTTCATATCACTCACTCCCAATCTCTATCTACCC  |
| Alx1 B5 15  | gaactgattctggtgtgttATTTCACTTCATATCACTCACTCCCAATCTCTATCTACCC   |
| Alx1 B5 16  | aattattgagaggcacatggATTTCACTTCATATCACTCACTCCCAATCTCTATCTACCC  |
| Alx1 B5 17  | ccccagaaagtaaagagtcaATTTCACTTCATATCACTCACTCCCAATCTCTATCTACCC  |
| Alx1 B5 18  | tcaaaagcatgtccattggtATTTCACTTCATATCACTCACTCCCAATCTCTATCTACCC  |
| Alx1 B5 19  | tcctttcaaattccggcttgATTTCACTTCATATCACTCACTCCCAATCTCTATCTACCC  |
| Alx1 B5 20  | agaactgcaatgctggaagaATTTCACTTCATATCACTCACTCCCAATCTCTATCTACCC  |
| Alx1 B5 21  | atagcccaggaaatattggcATTTCACTTCATATCACTCACTCCCAATCTCTATCTACCC  |

### **Supplementary Table 1**

**List of probes used for the SGA analysis** Each probe consists of a consensus sequence complementary to mRNA (lowercase letters), as well as a linker sequence and an initiator sequence (B1-B5) for the hairpins used for HCR amplification (capital letters).
